# Supplementary material
Source: ML conference proceedings conference paper supplement (https://openreview.net/forum?id=zpDGwcmMV4)
Supplement: supplementary_material [file attachment]

|               |                                              | iGSM-med pq |      |      |                   |      |      | iGSM-med qp |      |      |                   |      |      | iGSM-hard pq |      |     |                   |      |      | iGSM-hard qp |      |      |                   |      |      |      | row  |      |      |      |      |      |
|---------------|----------------------------------------------|-------------|------|------|-------------------|------|------|-------------|------|------|-------------------|------|------|--------------|------|-----|-------------------|------|------|--------------|------|------|-------------------|------|------|------|------|------|------|------|------|------|
|               |                                              | in-dist     |      |      | out-of-dist (OOD) |      |      | in-dist     |      |      | out-of-dist (OOD) |      |      | in-dist      |      |     | out-of-dist (OOD) |      |      | in-dist      |      |      | out-of-dist (OOD) |      |      |      | avg  |      |      |      |      |      |
| original      |                                              | 99.9        | 99.1 | 92.0 | 88.4              | 84.5 | 77.7 | 91.6        | 100  | 99.3 | 92.4              | 89.9 | 84.8 | 78.3         | 91.4 | 100 | 99.4              | 94.9 | 93.7 | 91.4         | 88.4 | 84.0 | 91.4              | 100  | 99.4 | 94.5 | 93.3 | 91.8 | 88.3 | 85.3 | 89.4 | 91.8 |
| retryrate0.05 | retry (finetune, lora qv4e8)                 | 100         | 98.4 | 86.9 | 82.1              | 75.6 | 67.5 | 92.4        | 99.5 | 98.7 | 85.7              | 79.5 | 73.5 | 64.7         | 91.1 | 100 | 99.2              | 92.6 | 89.7 | 86.3         | 81.0 | 75.6 | 95.2              | 100  | 98.9 | 91.4 | 88.0 | 84.4 | 80.6 | 73.9 | 92.3 | 87.5 |
| retryrate0.05 | retry (finetune, lora qv4e8)   with mask     | 100         | 99.3 | 91.8 | 88.6              | 83.6 | 75.6 | 93.8        | 99.7 | 99.5 | 91.5              | 87.7 | 81.9 | 75.0         | 91.9 | 100 | 99.1              | 93.7 | 92.0 | 89.0         | 84.8 | 80.6 | 92.1              | 100  | 99.3 | 94.8 | 92.5 | 90.3 | 85.9 | 82.8 | 91.5 | 90.9 |
| retryrate0.05 | retry (finetune, lora qv8e16)                | 99.9        | 98.5 | 88.7 | 84.3              | 77.6 | 70.1 | 91.6        | 99.8 | 98.9 | 87.2              | 82.7 | 76.2 | 68.3         | 91.7 | 100 | 99.2              | 93.7 | 90.2 | 88.0         | 83.6 | 79.3 | 95.1              | 99.9 | 98.9 | 92.1 | 89.0 | 86.0 | 81.7 | 76.2 | 90.9 | 88.6 |
| retryrate0.05 | retry (finetune, lora qv8e16)   with mask    | 99.9        | 99.2 | 91.7 | 88.9              | 82.9 | 77.0 | 93.4        | 99.9 | 99.5 | 91.7              | 88.1 | 82.4 | 76.0         | 92.4 | 100 | 99.1              | 94.1 | 92.5 | 90.1         | 86.0 | 82.1 | 92.1              | 100  | 99.4 | 94.6 | 92.5 | 90.7 | 86.6 | 83.1 | 91.9 | 91.3 |
| retryrate0.05 | retry (finetune, lora qv16e32)               | 99.9        | 98.7 | 89.4 | 84.7              | 79.6 | 72.7 | 92.5        | 99.9 | 98.9 | 87.8              | 83.4 | 77.1 | 69.8         | 91.4 | 100 | 99.3              | 93.9 | 91.3 | 88.7         | 84.9 | 80.9 | 95.3              | 99.9 | 99.0 | 93.0 | 89.6 | 87.0 | 83.0 | 76.6 | 91.7 | 89.3 |
| retryrate0.05 | retry (finetune, lora qv16e32)   with mask   | 100         | 99.2 | 91.9 | 88.5              | 83.3 | 76.6 | 93.3        | 99.9 | 99.4 | 92.4              | 88.9 | 83.5 | 77.5         | 92.5 | 100 | 99.3              | 95.3 | 93.0 | 91.2         | 86.7 | 83.3 | 92.1              | 100  | 99.4 | 95.2 | 92.9 | 91.9 | 88.2 | 84.4 | 91.8 | 91.7 |
| retryrate0.05 | retry (finetune, lora qv32e64)               | 99.9        | 98.8 | 89.9 | 85.7              | 80.8 | 73.8 | 92.7        | 99.9 | 99.1 | 88.9              | 83.7 | 78.1 | 71.4         | 91.7 | 100 | 99.4              | 94.5 | 91.9 | 89.6         | 86.0 | 81.7 | 95.2              | 99.9 | 99.1 | 93.4 | 90.6 | 88.1 | 85.0 | 79.5 | 91.7 | 90.0 |
| retryrate0.05 | retry (finetune, lora qv32e64)   with mask   | 100         | 99.3 | 92.2 | 88.6              | 84.0 | 76.5 | 93.6        | 99.9 | 99.5 | 92.5              | 89.0 | 84.1 | 78.1         | 92.4 | 100 | 99.4              | 95.1 | 93.2 | 90.8         | 86.4 | 83.0 | 92.1              | 100  | 99.5 | 94.8 | 93.1 | 91.8 | 88.4 | 84.3 | 91.7 | 91.8 |
| retryrate0.05 | retry (finetune, lora qv64e128)              | 100         | 99.0 | 89.9 | 86.3              | 81.0 | 74.9 | 93.0        | 99.8 | 99.2 | 89.4              | 85.1 | 79.3 | 72.7         | 91.5 | 100 | 99.3              | 95.1 | 92.5 | 90.5         | 87.3 | 83.3 | 95.2              | 100  | 99.2 | 94.0 | 91.5 | 89.4 | 86.2 | 81.1 | 91.9 | 90.6 |
| retryrate0.05 | retry (finetune, lora qv64e128)   with mask  | 100         | 99.3 | 92.7 | 89.3              | 84.5 | 78.0 | 93.1        | 99.8 | 99.4 | 92.2              | 88.3 | 82.9 | 76.6         | 92.1 | 100 | 99.4              | 95.0 | 92.9 | 91.2         | 87.2 | 83.6 | 92.4              | 100  | 99.5 | 95.8 | 93.5 | 92.5 | 88.3 | 85.7 | 91.9 | 91.9 |
| retryrate0.05 | retry (finetune, lora qv128e256)             | 100         | 98.9 | 90.2 | 86.7              | 82.2 | 75.5 | 92.7        | 99.9 | 99.2 | 89.5              | 84.8 | 79.7 | 73.3         | 91.6 | 100 | 99.5              | 94.7 | 93.0 | 89.9         | 86.7 | 83.8 | 95.4              | 99.9 | 99.2 | 94.8 | 92.2 | 89.7 | 86.0 | 81.8 | 91.5 | 90.7 |
| retryrate0.05 | retry (finetune, lora qv128e256)   with mask | 100         | 99.3 | 92.7 | 90.0              | 85.2 | 78.2 | 93.3        | 99.9 | 99.5 | 93.1              | 89.2 | 84.4 | 78.4         | 92.5 | 100 | 99.4              | 95.5 | 93.8 | 91.6         | 87.6 | 84.1 | 92.5              | 99.9 | 99.5 | 95.6 | 93.4 | 92.3 | 88.5 | 85.4 | 92.1 | 92.2 |
| retryrate0.05 | retry (finetune, lora qv256e512)             | 100         | 98.9 | 90.5 | 86.7              | 81.3 | 74.5 | 92.2        | 99.8 | 99.2 | 89.9              | 85.4 | 79.3 | 73.6         | 91.4 | 100 | 99.5              | 95.2 | 93.2 | 91.3         | 88.2 | 85.2 | 95.2              | 99.9 | 99.3 | 94.3 | 92.1 | 89.2 | 86.2 | 81.9 | 91.0 | 90.8 |
| retryrate0.05 | retry (finetune, lora qv256e512)   with mask | 100         | 99.3 | 92.6 | 89.7              | 84.7 | 78.0 | 93.2        | 99.9 | 99.4 | 92.3              | 88.9 | 83.3 | 77.5         | 92.4 | 100 | 99.4              | 95.7 | 93.9 | 92.0         | 88.4 | 85.4 | 92.5              | 99.9 | 99.6 | 96.2 | 94.3 | 93.2 | 89.7 | 86.4 | 91.9 | 92.3 |
| retryrate0.05 | retry (continued pretrain)                   | 100         | 99.8 | 96.6 | 93.5              | 90.4 | 85.2 | 95.1        | 100  | 99.8 | 96.1              | 93.5 | 89.1 | 84.8         | 92.8 | 100 | 100               | 98.6 | 97.9 | 96.6         | 95.4 | 93.6 | 96.9              | 100  | 99.9 | 98.5 | 97.5 | 96.9 | 95.4 | 93.3 | 93.0 | 95.7 |
| retryrate0.05 | retry (continued pretrain)   with mask       | 100         | 99.9 | 96.4 | 93.2              | 88.9 | 84.3 | 94.8        | 100  | 99.8 | 96.3              | 92.8 | 89.3 | 84.5         | 92.8 | 100 | 99.9              | 98.7 | 97.8 | 96.8         | 95.6 | 93.2 | 96.7              | 100  | 99.9 | 98.7 | 98.0 | 97.3 | 96.1 | 93.8 | 93.4 | 95.6 |
| retryrate0.05 | retry (continued pretrain x 0.1)             | 100         | 99.1 | 91.3 | 86.9              | 82.1 | 76.2 | 93.4        | 99.9 | 99.0 | 90.0              | 87.1 | 81.2 | 74.7         | 90.7 | 100 | 99.6              | 95.1 | 93.2 | 92.2         | 89.2 | 86.1 | 94.2              | 100  | 99.6 | 95.4 | 93.0 | 91.7 | 89.7 | 86.7 | 91.6 | 91.6 |
| retryrate0.05 | retry (continued pretrain x 0.1)   with mask | 100         | 99.1 | 90.6 | 87.2              | 82.7 | 76.9 | 92.6        | 99.9 | 99.1 | 90.3              | 86.7 | 81.6 | 75.0         | 91.2 | 100 | 99.6              | 95.5 | 93.4 | 92.6         | 89.8 | 86.1 | 94.4              | 100  | 99.3 | 95.1 | 93.3 | 91.5 | 89.3 | 86.7 | 91.3 | 91.7 |
| retryrate0.05 | retry (pretrain)                             | 100         | 99.7 | 94.8 | 93.0              | 88.5 | 83.9 | 94.5        | 100  | 99.4 | 93.3              | 89.2 | 85.7 | 78.8         | 92.4 | 100 | 99.6              | 96.6 | 94.8 | 93.2         | 90.7 | 86.9 | 94.8              | 100  | 99.7 | 96.2 | 93.7 | 92.7 | 89.4 | 86.3 | 92.1 | 93.3 |
