# Supplementary material
Source: ML conference proceedings conference paper supplement (https://openreview.net/forum?id=zpDGwcmMV4)
Supplement: supplementary_material [file attachment]

# LANGUAGE MODELS, GRADE-SCHOOL MATH, AND THE HIDDEN REASONING PROCESS

**Anonymous authors**

Paper under double-blind review

## ABSTRACT

Recent advances in language models have demonstrated their capability to solve mathematical reasoning problems, achieving near-perfect accuracy on grade-school level math benchmarks like GSM8K. In this paper, we formally study how language models solve these problems. We design a series of controlled experiments to address several fundamental questions: (1) Can language models truly develop reasoning skills, or do they simply memorize templates? (2) What is the model’s hidden (mental) reasoning process? (3) Do models solve math questions using skills similar to or different from humans? (4) Do models trained on GSM8K-like datasets develop reasoning skills beyond those necessary for solving GSM8K problems? (5) What mental process causes models to make reasoning mistakes? (6) How large or deep must a model be to effectively solve GSM8K-level math questions? Our study uncovers many hidden mechanisms by which language models solve mathematical questions, providing insights that extend beyond current understandings of LLMs.

## 1 INTRODUCTION

Language models like GPT-4 (OpenAI, 2023) have shown initial signs of general intelligence (Bubeck et al., 2023), while smaller models have demonstrated good reasoning abilities by solving challenging coding/math problems (Li et al., 2023; Gunasekar et al., 2023; Liu et al., 2023). In this paper, we focus on the ability of small language models to solve grade-school math problems. Unlike previous works that empirically push the accuracy of models on grade-school math benchmarks like GSM8K (Cobbe et al., 2021) and its augmentations (e.g., Liu et al. (2023); Zhang et al. (2024)), we take a principled approach. We aim to study the following fundamental questions:

1. How do language models learn to solve grade-school level math problems? Do they just memorize templates, or do they learn reasoning skills similar to humans? Or do they discover new skills to solve the problems?
2. Do models trained *solely* on grade-school math problems only learn to solve these problems, or do they develop some more general intelligence?
3. How small can a language model be while still solving grade-school math problems? Is depth (number of layers) more important than width (number of neurons per layer), or does only size matter as suggested by practitioners (Kaplan et al., 2020)?

These questions are fundamental to understanding the intelligence of language models. To study them, it might seem tempting to start with a pre-trained model and fine-tune it on existing datasets like GSM8K or GPT-4 augmented ones. However, this approach has significant limitations:

- **DATA CONTAMINATION.** The pretrain data of existing models mostly come from publicly available internet (Gao et al., 2020), which is a pile of mess. We do not know how many math problems are included or their structures. There is *significant concern regarding* whether the GSM8K benchmark has been *leaked to language models’ training datasets* (Zhang et al., 2024). Even if the exact data is not, the pre-trained model might have seen almost identical questions (e.g., the same problem with different numbers). Thus, this approach cannot answer questions 1-3. We do not know whether a model truly learns the reasoning skills or it simply memorizes problem templates during training. Therefore, we **need full control over the model’s pretrain data** and must train a language model from scratch. This point has been reiterated recently in (Allen-Zhu & Li, 2024a; 2023b).

- SOLUTION DIVERSITY. The existing fine-tuning data, such as the GSM8K training set, contains only 7.5K grade-school math problems, which is insufficient to train a model from scratch. Although recent works use GPT-4 to augment GSM8K, this is not enough for our purpose. GPT-4 augmented problems might be biased towards a small number of solution templates, since the original GSM8K data has very few (obviously, at most 8K) solution templates. **We need a much larger, more diverse set of grade-school math problems.**

With these points in mind, we introduce our framework to generate a large set of diverse grade-school math (GSM) problems and use the dataset to train (from scratch) and test a GPT2-like language model. In the framework, we focus on the “logical reasoning” aspect of grade-school math problems, which involves the dependency of parameters in the problem statement, such as “Alice’s apple is three times the sum of Bob’s orange and Charles’s banana.” We use synthetic sentences to reduce the difficulty arising from *Common Sense*, like “a candle burned for 12 hours at 1 inch per hour” (implying the candle is reducing in length). We also *intentionally remove* the difficulty from pure arithmetic: we only consider integers mod23.<sup>1</sup>

Moreover, our framework ensures that the generated math problems are highly diverse and do not come from a small subset of templates. Even ignoring all the arithmetic, English, variable names, and unused parameters, our problems still have more than 90 trillion solution templates (see Proposition 2.2), much larger than the size of GPT2-small (100M). Thus, language models **cannot** solve the math problems in our case **by simply memorizing** the solution templates.

In this paper, we use the GPT2 model (Radford et al., 2019), but replace its positional embedding with rotary embedding (RoPE) (Su et al., 2021; Black et al., 2022). We still call it GPT2 for brevity. We summarize our main contributions:

- RESULT 2. We demonstrate that the GPT2 model, pretrained on our synthetic dataset, not only achieves 99% accuracy in solving math problems from the same distribution but also generalizes to out-of-distribution problems, such as those requiring *longer reasoning lengths* than any seen during training. This is similar to length generalization in arithmetic (Anil et al., 2022; Jelassi et al., 2023), however, in our case, the model **has never seen any** training example of such reasoning length. This signifies that the model can genuinely learn reasoning skills instead of memorizing solution templates.
- RESULT 3. Crucially, the model can learn to generate shortest solutions, almost always avoiding *unnecessary* computations. This suggests that the model *formulates a plan* before it generates, avoiding computing any quantities not needed towards solving the underlying math problem.
- RESULT 4. We examine the model’s internal states through probing, introducing six probing tasks to elucidate *how* the model solves math problems. For instance, we discover the model (mentally!) preprocesses the full set of necessary parameters before it starts any generation. Likewise, humans also do this preprocess although we write this down on scratch pads.
- RESULT 5. Surprisingly, the model also learns *unnecessary, yet important* skills after pretraining, such as all-pair dependency. Before any question is asked, it already (mentally!) computes with good accuracy which parameters depend on which, even though *some are not needed for solving the math problem*. Note that computing all-pair dependency is a skill **not needed** to fit all the solutions in the training data. To the best of our knowledge, this is the first evidence that a language model can **learn useful skills beyond** those necessary to fit its pretraining data.<sup>2</sup> This may be a preliminary signal of **where the G in AGI** can come from.<sup>3</sup>
- RESULT 6. We explain *why* mistakes occur. For instance, the model makes systematic errors that can be explained by probing its internal states. Sometimes, these mistakes can be predicted before the model generates answers, making them independent of the random generation process. We connect this to practice, noting that GPT-4/4o also makes similar errors (though we cannot probe their internal states).

<sup>1</sup>The conclusions of this paper remain if one replaces 23 with, e.g., 2003. However, for a better-controlled experiment, we wish to *separate reasoning from arithmetic*. For instance, if a model fails, we want to ensure it is *not* due to an arithmetic error — after all, memorizing the multiplication table for 23 integers is trivial.

<sup>2</sup>In our case, one can solve all the math problems without computing all-pair dependency. Our pretraining data never includes such information — all the solutions only compute necessary variables.

<sup>3</sup>Indeed, the skill to sort relationships among in-context objects is a general skill, which may lead to — via instruction fine-tuning — skills for solving other tasks, such as discovering causal relationships, determining the influence of parameter changes, etc.

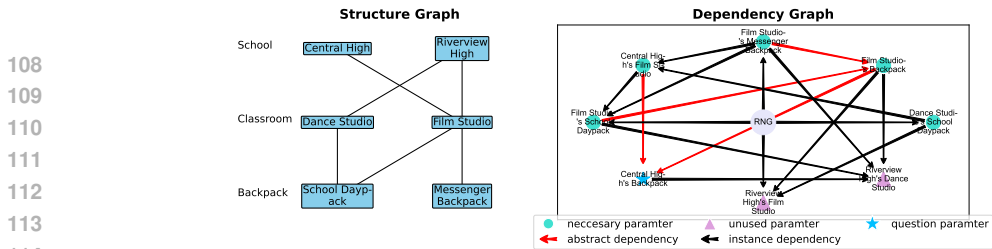

Figure 1: Structure and dependency graph corresponding to the  $op = 7$  easy example in (2.1) and (2.2). Dependencies from abstract parameters are drawn in red, and from instance parameters are in black.

- RESULT 7+8. The depth of the language model is crucial for its reasoning ability. For example, a 16-layer, 576-dim transformer solves harder problems (in reasoning length) than a 4-layer, 1920-dim one, despite the latter being twice as large. This holds even when Chain-of-Thought (CoT) is used. We explain this necessity in depth by the complexity of the mental processes involved. We advocate for the use of controlled, synthetic data as a more principled approach to derive such claims, contrasting with predictions like “only size matters” based on training loss using internet pretrain data (Kaplan et al., 2020).

While we refrain from overstating that our findings directly apply to foundation models like GPT-4 or more challenging mathematical reasoning tasks, we believe our work significantly advances the understanding of how language models develop their mathematical reasoning skills, and this **has to be done in a way different from pushing benchmarks**.

## 2 RESULT 1: DATA GENERATION

**Motivation.** Recall a standard grade-school math problem in the GSM8K dataset looks like:

Betty is saving money for a new wallet which costs 100. Betty has only half of the money she needs. Her parents decided to give her 15 for that purpose, and her grandparents twice as much as her parents. How much more money does Betty need to buy the wallet?

This problem involves multiple parameters whose values are connected through various equalities, such as “Betty’s current money =  $0.5 \times$  cost of the wallet” and “money given by grandparents =  $2 \times$  money given by parents.” Motivated by this, we build a GSM8K-like math dataset through a synthetic generation pipeline that captures the dependencies of parameters. We wish to capture at least the following three types of dependencies.

1. Direct dependency ( $\heartsuit$ ): such as  $A = 5 \times (X + Y)$ , so  $A$  can be computed after  $X$  and  $Y$ .
2. Instance dependency ( $\spadesuit$ ): such as “every classroom has  $X$  chairs, and there are  $Y$  classrooms.” Here, the model must infer the total number of chairs by multiplying  $X$  by  $Y$ .
3. Implicit dependency ( $\clubsuit$ ): such as “Bob has 3 times more fruits than Alice. Alice has 3 apples, 4 eggs and 2 bananas.” Here, the model must learn that apples and bananas are fruits and egg is not, and “Alice’s fruits” is an abstract parameter derived from the problem statement.

### 2.1 STEP 1: GRAPH CONSTRUCTION AND PROBLEM GENERATION

**Hierarchical categorization.** We use a layered structure of *categories*, each contains possible *items*. For instance, categories = (School, Classroom, Backpack) has three layers; category School = {Central High, Riverview High, ...}; category Classroom = {Dance Studio, Film Studio, ...}; category Backpack = {School Daypack, Messenger Backpack, ...}. We prepare 4 predefined hierarchical categorizations, each with 4 layers and 100 items/layer; this represents the world knowledge.

**Structure graph.** In each math problem, only specific items exist, leading to a *structure graph* that outlines what sub-items can appear under what item, see Figure 1. For instance,

- Connecting Dance Studio and School Daypack with an edge signifies an *instance parameter*, “the number of school daypacks in each dance studio,” which is a quantifiable variable that can be assigned.<sup>4</sup> This captures the instance dependency ( $\spadesuit$ ) as mentioned above.
- *Abstract parameters*, like “the total number of classrooms in Central High,” cannot be assigned and are excluded from the structure graph. They reflect implicit dependency ( $\clubsuit$ ).

<sup>4</sup>Even though Central High and Riverview High can both have (possibly multiple) Dance Studios, for simplicity, we assume that each Dance Studio has the same number of School Daypacks.

Remark 2.1. Rather than using simple objects like *Alice’s apple* or fake items like *Items A/B/C/D*, this structure allows us to describe abstract parameters and adds 2 levels of complexity to the data:

- The model must implicitly learn English concepts, such as a classroom category includes 100 different classroom types. These concepts cannot be derived from individual math problems, as only a limited selection of classrooms will be mentioned in each problem.
- The model is required to hierarchically access multiple items to calculate abstract parameters, as opposed to a straightforward retrieval of “Alice’s apple” in the context.<sup>5</sup>

**Dependency graph.** The *dependency graph* is a directed acyclic graph that outlines the dependency among parameters. For each *instance parameter*, we choose a random set of (up to 4) parameters it can depend on — including possibly a special vertex RNG representing a random number generator. For instance, if “[param A] is  $X$  more than the difference of [param B] and [param C]” for  $X$  being randomly generated, then we draw edges from B, C and RNG to parameter A. The dependency of abstract parameters is implied by the dependency of instance parameters. This captures direct dependency ( $\heartsuit$ ) as mentioned above. We give an examples in Figure 1 (right).

**Problem generation.** The *problem* is articulated by describing the dependency graphs in English, one sentence for each instance parameter.<sup>6</sup> (Abstract parameters are not described because they are inherited by the structure graph.) We **randomly permute** the sentence ordering to further increase difficulty. A parameter is selected and asked with a question in the end (or at the beginning). Below is an easy example corresponding to Figure 1; a harder example is in Figure 10.

(Problem - Easy) The number of each Riverview High’s Film Studio equals 5 times as much as the sum of each Film Studio’s Backpack and each Dance Studio’s School Daypack. The number of each Film Studio’s School Daypack equals 12 more than the sum of each Film Studio’s Messenger Backpack and each Central High’s Film Studio. The number of each Central High’s Film Studio equals the sum of each Dance Studio’s School Daypack and each Film Studio’s Messenger Backpack. The number of each Riverview High’s Dance Studio equals the sum of each Film Studio’s Backpack, each Film Studio’s Messenger Backpack, each Film Studio’s School Daypack and each Central High’s Backpack. The number of each Dance Studio’s School Daypack equals 17. The number of each Film Studio’s Messenger Backpack equals 13. *How many Backpack does Central High have?*

(2.1)

## 2.2 STEP 2: SOLUTION CONSTRUCTION (CoT)

Let *solution* be a sequence of sentences describing the *necessary* steps towards solving the given problem, where the sentences follow any topological order — also known as Chain-of-Thought, CoT. For each parameter *necessary* towards answering the final question, we assign to it a random letter among the 52 choices (a..z or A..Z), and use a sentence to describe its computation:

Define [param] as X; [intermediate steps]; so X = ...

Throughout this paper, we consider **arithmetics mod 23** to avoid errors from computation involving large numbers. It is perhaps the easiest to directly see a solution example (corresponding to (2.1)), and a more involved example is in Figure 10:

(Solution - Easy) Define Dance Studio’s School Daypack as p; so p = 17. Define Film Studio’s Messenger Backpack as W; so W = 13. Define Central High’s Film Studio as B; so B = p + W = 17 + 13 = 7. Define Film Studio’s School Daypack as g; R = W + B = 13 + 7 = 20; so g = 12 + R = 12 + 20 = 9. Define Film Studio’s Backpack as w; so w = g + W = 9 + 13 = 22. Define Central High’s Backpack as c; so c = B \* w = 7 \* 22 = 16. *Answer: 16.*

(2.2)

We emphasize that:

- The solution only contain parameters *necessary* towards calculating the final query parameter.
- The solution follows the correct logical order: i.e. all the parameters used in the calculation must have appeared and been computed beforehand.

<sup>5</sup>For example, the total number of backpacks in Riverview High in Figure 1 is calculated as  $ip_1 \times ap_1 + ip_2 \times ap_2$  where  $ip_1 =$  “Riverview High’s number of Dance Studios”,  $ip_2 =$  “Riverview High’s number of Film Studios”,  $ap_1 =$  “each Dance Studio’s number of Backpacks”, and  $ap_2 =$  “each Film Studio’s number of Backpacks”, with  $ip_1, ip_2$  being instance parameters and  $ap_1, ap_2$  abstract parameters. Here, the model must not only retrieve  $ip_1, ip_2$  but also compute  $ap_1, ap_2$  hierarchically.

<sup>6</sup>We use simple English sentence templates to describe the problem, and did not worry about grammar mistakes such as singular vs plural forms. There are other sources of randomness besides the dependency graph, such as when parameter  $A$  depends on  $B, C$  it could be  $A + B$  or  $A - B$ .

|                       |                 |                 |                 |                 |                 |                 |                 |                 |                 |                 |                 |                 |                 |                 |                 |                 |                 |                 |                 |                 |
|-----------------------|-----------------|-----------------|-----------------|-----------------|-----------------|-----------------|-----------------|-----------------|-----------------|-----------------|-----------------|-----------------|-----------------|-----------------|-----------------|-----------------|-----------------|-----------------|-----------------|-----------------|
| 5-shot on GPT-4-turbo | 96.7%<br>=29/30 | 90.0%<br>=27/30 | 80.0%<br>=24/30 | 93.3%<br>=28/30 | 56.7%<br>=17/30 | 56.7%<br>=17/30 | 50.0%<br>=15/30 | 50.0%<br>=15/30 | 43.3%<br>=13/30 | 33.3%<br>=10/30 | 40.0%<br>=12/30 | 33.3%<br>=10/30 | 43.3%<br>=13/30 | 30.0%<br>=9/30  | 36.7%<br>=11/30 | 26.7%<br>=8/30  | 46.7%<br>=14/30 | 43.3%<br>=13/30 | 40.0%<br>=12/30 |                 |
| 5-shot on GPT-4o      | 96.7%<br>=29/30 | 100%<br>=30/30  | 90.0%<br>=27/30 | 93.3%<br>=28/30 | 86.7%<br>=26/30 | 86.7%<br>=26/30 | 73.3%<br>=22/30 | 70.0%<br>=21/30 | 70.0%<br>=21/30 | 50.0%<br>=15/30 | 43.3%<br>=13/30 | 56.7%<br>=17/30 | 46.7%<br>=14/30 | 36.7%<br>=11/30 | 43.3%<br>=13/30 | 46.7%<br>=14/30 | 46.7%<br>=14/30 | 36.7%<br>=11/30 | 46.7%<br>=14/30 | 46.7%<br>=14/30 |
| guess ans=0           | 23.5%           | 28.8%           | 29.7%           | 30.7%           | 30.6%           | 31.4%           | 30.3%           | 31.9%           | 30.9%           | 30.1%           | 31.8%           | 31.2%           | 33.0%           | 30.4%           | 32.3%           | 32.6%           | 32.8%           | 33.8%           | 34.5%           |                 |
|                       | op=2            | op=3            | op=4            | op=5            | op=6            | op=7            | op=8            | op=9            | op=10           | op=11           | op=12           | op=13           | op=14           | op=15           | op=16           | op=17           | op=18           | op=19           | op=20           |                 |

Figure 2: GPT-4 (OpenAI, 2023) few-shot accuracies on iGSM-med<sub>pq</sub> (with mod5 arithmetics). For each op we tested 30 problems; and guessing ans = 0 ∈ {0, 1, 2, 3, 4} gives a baseline accuracy around 32%. Details are in Appendix H, where we also showcase how GPT-4/4o make mistakes.

- We break computations to binary ops:  $g = 12 + 13 + 7$  is broken into  $g = 12 + R$  and  $R = 13 + 7$  in the above solution. The number of semicolons “;” equals the number of operations. This reduces the arithmetic complexity of the solution, which is not the focus of this paper.<sup>7</sup>

### 2.3 DIFFICULTY CONTROL

Although deferring all the data-generation pseudocode to Appendix E, we summarize below the main randomness used in the data generation process. This includes the random choice of a hierarchical categorization (i.e., the English part); a structure graph (i.e., the instance parameters); a dependency graph; arithmetic computations on the dependency graph; integer numbers (i.e., the RNG); problem sentence permutation; and the query parameter.

We use two parameters to control data’s difficulty: ip is the number of instance parameters, and op is the number of solution operations; the data’s difficulty is an increasing function over them. We call our dataset iGSM, to reflect the nature that such synthetic dataset can be of *infinite size*. We use  $iGSM^{op \leq op, ip \leq ip}$  to denote the data generated with constraint  $op \leq op$  and  $ip \leq ip$ , and use  $iGSM^{op=op, ip \leq ip}$  to denote those restricting to  $op = op$ .

### 2.4 TRAIN AND TEST DATASETS

We consider two families of datasets.

- In the iGSM-med data family we use  $ip \leq 20$ .  
The training data is  $iGSM-med^{op \leq 15} := iGSM^{op \leq 15, ip \leq 20}$ . We evaluate the pretrained model both in-distribution, on  $iGSM-med^{op \leq 15}$  and  $iGSM-med^{op=15}$ , and out-of-distribution (OOD), on  $iGSM-med^{op=op}$  for  $op \in \{20, 21, 22, 23\}$  and  $iGSM-med^{op=op, reask}$ . Here, reask denotes first generating a problem from  $iGSM-med^{op=op}$  and then resampling a query parameter.<sup>8</sup>
- In the iGSM-hard data family we use  $ip \leq 28$ .  
The training data is  $iGSM-hard^{op \leq 21} := iGSM^{op \leq 21, ip \leq 28}$ . We evaluate the pretrained model both in-distribution, on  $iGSM-hard^{op \leq 21}$  and  $iGSM-hard^{op=21}$ , and OOD on  $iGSM-hard^{op=op}$  for  $op \in \{28, 29, 30, 31, 32\}$  and  $iGSM-hard^{op=op, reask}$ .

Additionally, we use iGSM-med<sub>pq</sub> to indicate placing question *after* problem and iGSM-med<sub>qp</sub> the other way (similarly for iGSM-hard). The difficulty of iGSM-med is already quite non-trivial to humans (at least not solvable with few-shot learning using GPT-4/4o, see Figure 2).

**Proposition 2.2.** *Ignoring unused parameters, numerics, sentence orderings, English words, a-z and A-Z letter choices, iGSM-med<sup>op=15</sup> still has at least 7 billion solution templates, and iGSM-hard<sup>op=21</sup> has at least 90 trillion solution templates.*<sup>9</sup>

**No data contamination.** A goal in synthetic math data generation is to prevent data contamination in internet-based math datasets, as noted in Zhang et al. (2024). While it *may be impossible to certify*

<sup>7</sup>Even GPT-4 can make mistakes on calculating “3 \* (4+10) + 12 \* (5+6)” without using external calculator.

<sup>8</sup>Due to the topological nature of our data/solution generation process, reask greatly changes the data distribution and the number of operations needed. It provides an excellent OOD sample for evaluation. Details are in Appendix E.

<sup>9</sup>A solution template is created by replacing all numbers with ‘0’, substituting variables (a-z or A-Z) with letters in their appearance order, and changing parameters to their types (instance or abstract). For instance, “Define Owl Forest’s Elephant as y; so y = 11. Define Parrot Paradise’s Raccoon as t; so t = y = 11.” becomes “Define Inst as a; so a = 0. Define Inst as b; so b = a = 0.” We use birthday paradox to estimate the number of solution templates. If M randomly generated problems yield distinct templates, it suggests with good probability that the total number of templates exceeds  $\Omega(M^2)$ .

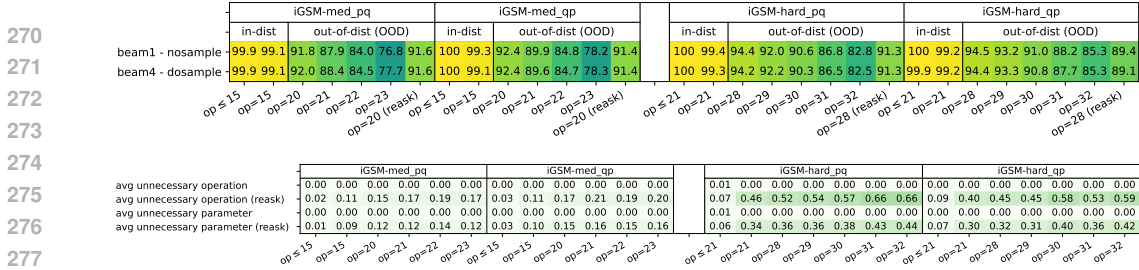

Figure 3: (Top): test accuracies on the model pre-trained from iGSM-med<sub>pq/qp</sub> and iGSM-hard<sub>pq/qp</sub> datasets. (Bottom): number of unnecessary params / ops per generated correct solution. Details in Appendix F.

that models trained on internet data are free from contamination, in our setting, we can certify this:

1. We perform OOD evaluation such as on  $op \geq 28$  while providing only  $op \leq 21$  training samples.
2. We train with data whose hash value of solution template (see Footnote 9) is  $< 17 \pmod{23}$ , and test with those  $\geq 17$ . This ensures no template-level overlap between training and testing.

### 3 RESULT 2-3: SUMMARIZE MODEL’S BEHAVIOR PROCESS

We use the GPT2 architecture (Radford et al., 2019) but replacing its absolute positional embedding with rotary embedding (Su et al., 2021; Black et al., 2022), yet still referring to it as GPT2 for short.<sup>10</sup> We mostly stick to the 12-layer, 12-head, 768-dim GPT2 (a.k.a. GPT2-small) for experiments, but we explore larger models in Section 6. We use a context length of 768 / 1024 for pretraining on iGSM-med/iGSM-hard and 2048 for evaluation. More details are in Appendix F.

**Result 2: accuracy.** After sufficient pre-training, we give the model a problem from the test set (without solution) and let it continue to generate (allegedly a solution followed by an answer). Because we have restricted ourselves to a fixed solution format, language models can learn the format easily, allowing us to write a solution parser to check if the solution is fully correct.<sup>11</sup>

Figure 3 shows that GPT2 performs well when pretrained using iGSM-med or iGSM-hard data, even when evaluated out-of-distribution on harder (i.e., larger op) math problems. Thus, the model can truly learn some reasoning skill instead of memorizing solution templates.<sup>12</sup> This could be reminiscent of language models’ length generalization capability on arithmetics (Zhou et al., 2023; Jelassi et al., 2023); however, in our case, op captures the “reasoning length” and our model has never seen any training example of the same reasoning length as in test time.

Such accuracies also indicate that our iGSM data families are indeed good for pretraining purpose, allowing us to investigate further how LLMs can solve grade-school math problems.

*Remark 3.1.* Our controlled experiment distinguishes between “reasoning length generalization” and “token length generalization”. When designing our test data, we ensured that the test data have a similar token length compared to the training data (though with longer “reasoning length”, see Appendix F.1). Thus, Figure 3 primarily addresses the model’s “reasoning length generalization”. For readers interested in “token length generalization”, we include this in Appendix G.

**Result 3: solution redundancy.** We examine whether GPT2 achieves high accuracy by

- brute-forcedly computing all the parameters during generation (a “level-0” reasoning skill), or
- computing only necessary parameters to give shortest solutions (a “level-1” reasoning skill).

Recall our iGSM (pretrain) data only contains necessary solution steps (i.e., CoT) to simulate what we see in textbook solutions for math problems. For instance, if a problem describes  $X=3+2$ ,  $E=3+X$ ,  $Y=X+2$  and asks for the value of Y, then a shortest solution would be “ $X=3+2=5$  and

<sup>10</sup>We also tested Llama architectures (esp. with gated MLP layers) and didn’t see major change. GPT2-rotary performs no worse than Llama for knowledge tasks (Allen-Zhu & Li, 2024b). We are bounded by resources to repeat all experiments in this paper with other architectures that have small differences from GPT2-rotary.

<sup>11</sup>We check not only the correctness of the final 0..22 but also the calculations and parameter dependencies.

<sup>12</sup>Llama (of the same model size) gives similar performance, but we refrain from repeating all the experiments with another model. We are not interested in small model differences in this theoretical study; instead, we care more about the general behavior of (autoregressive) language models.



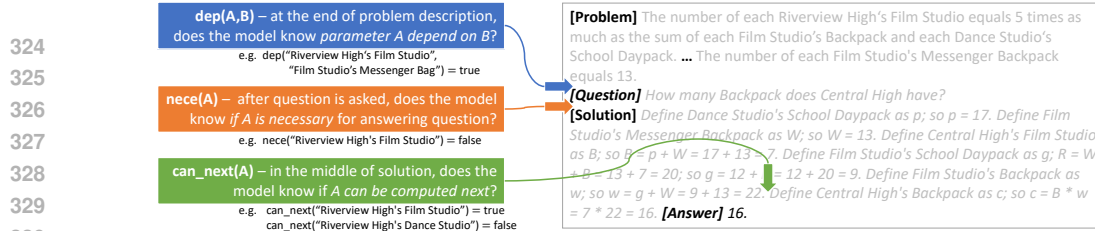

Figure 4: To discover model’s mental (reasoning) process.

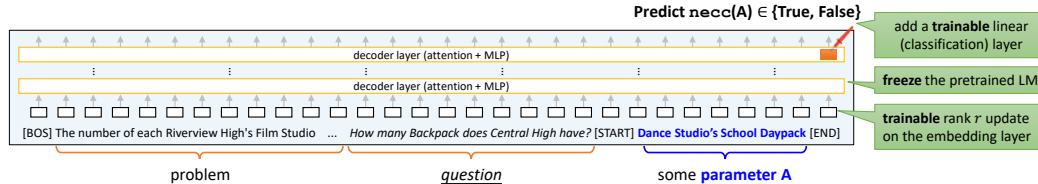Figure 5: Illustrations of V-probing on the  $necc(A)$  task. For other tasks, see Figure 12.

340  $Y=X+2=7$ ” without ever computing E.

341 Figure 3 shows that GPT2 predominantly solves the iGSM problems with a “level-1” reasoning skill, avoiding unnecessary computations, even when evaluated out-of-distribution. This finding is significant as it suggests that, unlike humans who usually rely on “backward reasoning” and a scratch pad to write down necessary parameters by backtracking the dependencies from the question (Rips, 1994), the language model can directly generate shortest solutions without using a scratch pad. But, how does it achieve so? We shall investigate in the next section.

#### 348 4 RESULT 4-5: DISCOVER MODEL’S MENTAL PROCESS

349 To understand how the model learns to solve math problems, we propose studying the following probing tasks, which align closely with human problem-solving strategies:

- 352 •  $nece(A)$ : if parameter  $A$  is necessary for computing the answer.
- 353 •  $dep(A, B)$ : if parameter  $A$  (recursively) depends on parameter  $B$  given the problem statement.
- 354 •  $known(A)$ : if parameter  $A$  has already been computed.
- 355 •  $value(A)$ : the value of parameter  $A$  (a number between 0-22, or 23 if  $known(A) = \text{false}$ ).
- 356 •  $can\_next(A)$ : if  $A$  can be computed in the next solution sentence (namely, its predecessors have all been calculated). Note that  $A$  might not be necessary to answer the question.
- 357 •  $nece\_next(A)$ : if parameter  $A$  satisfies both  $can\_next(A)$  and  $nece(A)$ .

359 For a model to generate the shortest solutions, it must identify  $nece(A)$  for all  $A$ ’s in its mental process. This is because whether  $nece(A)$  is true directly corresponds to whether there is a solution sentence to compute  $A$ . However, *how early* does the model recognize this, and how is it stored? Similarly, does it recognize dependencies between parameters ( $dep$ )? If so, how early is this mental process completed? Moreover, in the *middle of solution generation*, does the model keep track of each parameter  $A$ ’s value at all times ( $value$ ,  $known$ )? Does the model mentally know all possible parameters  $A$  that are ready to compute in the next sentence ( $can\_next$ )? Or does it only focus on  $A$  that is both ready and necessary ( $nece\_next$ )?

367 This section proposes probing technique to answer all of these questions.

##### 369 4.1 V-PROBING: A NEARLY-LINEAR PROBING METHOD

370 As illustrated in Figure 4, we conduct probing at the end of the problem description for the  $dep$  task, and end of the question description  $nece$  task.<sup>13</sup> For other tasks, we probe them at the end of every solution sentence (including the start of the first solution sentence).

374 Recall that standard *linear probing* involves freezing a pretrained language model and checking if a property is linearly encoded at a hidden layer (usually the last layer) for a given token position. This

377 <sup>13</sup>If the problem format is qp (question asked before the problem) then we probe  $nece$  and  $dep$  both after the problem description.

| can_next(A) |                   |         |                   |         |                   | dep(A,B) |                   |         |                   |         |                   | known(A) |                   |         |                   |       |       |       |       |       |       |       |       |       |       |
|-------------|-------------------|---------|-------------------|---------|-------------------|----------|-------------------|---------|-------------------|---------|-------------------|----------|-------------------|---------|-------------------|-------|-------|-------|-------|-------|-------|-------|-------|-------|-------|
| iGSM-med    |                   |         | iGSM-hard         |         |                   | iGSM-med |                   |         | iGSM-hard         |         |                   | iGSM-med |                   |         | iGSM-hard         |       |       |       |       |       |       |       |       |       |       |
| in-dist     | out-of-dist (OOD) | in-dist | out-of-dist (OOD) | in-dist | out-of-dist (OOD) | in-dist  | out-of-dist (OOD) | in-dist | out-of-dist (OOD) | in-dist | out-of-dist (OOD) | in-dist  | out-of-dist (OOD) | in-dist | out-of-dist (OOD) |       |       |       |       |       |       |       |       |       |       |
| 57.4        | 59.9              | 57.0    | 56.7              | 55.7    | 55.6              | 61.7     | 65.3              | 61.4    | 61.3              | 59.2    | 58.5              | 58.4     | 84.6              | 82.2    | 83.0              | 83.5  | 83.5  | 83.7  | 82.6  | 79.5  | 80.2  | 81.3  | 82.2  | 82.8  | 82.7  |
| 99.9        | 99.3              | 99.3    | 99.1              | 99.0    | 99.8              | 99.4     | 99.1              | 99.0    | 99.0              | 99.9    | 98.9              | 98.9     | 99.3              | 99.3    | 99.0              | 99.0  | 99.0  | 99.0  | 99.7  | 99.4  | 99.2  | 99.1  | 99.2  | 99.1  | 99.3  |
| 99.6        | 99.1              | 98.8    | 98.6              | 98.7    | 98.5              | 99.5     | 99.1              | 99.0    | 99.0              | 99.0    | 99.0              | 99.0     | 99.6              | 99.0    | 98.9              | 98.9  | 98.9  | 98.9  | 99.7  | 99.4  | 99.2  | 99.1  | 99.2  | 99.1  | 99.3  |
| 65.8        | 62.0              | 62.6    | 62.3              | 63.0    | 63.3              | 63.1     | 59.3              | 60.6    | 60.5              | 62.0    | 62.2              | 62.3     | 84.6              | 82.2    | 83.0              | 83.5  | 83.7  | 82.6  | 79.5  | 80.2  | 81.3  | 82.2  | 82.8  | 82.7  | 81.9  |
| 65.7        | 61.8              | 62.5    | 62.2              | 62.7    | 63.1              | 63.0     | 59.2              | 60.8    | 60.9              | 61.8    | 62.2              | 62.6     | 84.6              | 82.2    | 83.0              | 83.5  | 83.7  | 82.6  | 79.5  | 80.2  | 81.3  | 82.2  | 82.8  | 82.7  | 81.9  |
| op=15       | op=15             | op=20   | op=20             | op=22   | op=22             | op=21    | op=21             | op=28   | op=28             | op=30   | op=30             | op=31    | op=15             | op=15   | op=20             | op=20 | op=22 | op=22 | op=21 | op=21 | op=28 | op=28 | op=30 | op=30 | op=31 |

  

| nece(A)  |                   |         |                   |         |                   | nece_next(A) |                   |         |                   |         |                   | value(A) |                   |         |                   |       |       |       |       |       |       |       |       |       |       |
|----------|-------------------|---------|-------------------|---------|-------------------|--------------|-------------------|---------|-------------------|---------|-------------------|----------|-------------------|---------|-------------------|-------|-------|-------|-------|-------|-------|-------|-------|-------|-------|
| iGSM-med |                   |         | iGSM-hard         |         |                   | iGSM-med     |                   |         | iGSM-hard         |         |                   | iGSM-med |                   |         | iGSM-hard         |       |       |       |       |       |       |       |       |       |       |
| in-dist  | out-of-dist (OOD) | in-dist | out-of-dist (OOD) | in-dist | out-of-dist (OOD) | in-dist      | out-of-dist (OOD) | in-dist | out-of-dist (OOD) | in-dist | out-of-dist (OOD) | in-dist  | out-of-dist (OOD) | in-dist | out-of-dist (OOD) |       |       |       |       |       |       |       |       |       |       |
| 74.7     | 54.8              | 80.1    | 50.4              | 51.4    | 52.1              | 70.3         | 53.1              | 56.9    | 56.4              | 55.5    | 55.6              | 56.7     | 94.9              | 93.5    | 93.1              | 92.9  | 92.9  | 92.8  | 94.5  | 93.0  | 92.6  | 92.7  | 93.0  | 92.5  |       |
| 99.9     | 99.8              | 99.8    | 99.7              | 99.9    | 99.4              | 99.6         | 99.6              | 99.1    | 98.6              | 97.9    | 97.1              | 95.3     | 99.9              | 99.8    | 99.9              | 99.9  | 99.8  | 99.7  | 99.7  | 99.9  | 99.8  | 99.8  | 99.8  | 99.8  |       |
| 99.9     | 99.9              | 99.5    | 99.4              | 99.3    | 99.2              | 99.8         | 99.8              | 99.7    | 99.7              | 99.6    | 99.4              | 99.3     | 99.5              | 99.2    | 99.3              | 99.3  | 99.2  | 99.2  | 99.7  | 99.7  | 99.5  | 99.4  | 99.3  | 99.2  | 99.2  |
| 74.7     | 55.8              | 81.1    | 51.3              | 52.0    | 52.8              | 70.3         | 53.0              | 56.9    | 56.4              | 55.5    | 55.6              | 56.7     | 94.9              | 93.5    | 93.1              | 92.9  | 92.8  | 94.5  | 93.0  | 92.6  | 92.7  | 93.0  | 92.5  | 92.5  |       |
| 74.0     | 55.6              | 80.2    | 51.8              | 51.3    | 52.0              | 69.2         | 51.3              | 49.1    | 48.9              | 50.4    | 50.8              | 50.5     | 94.7              | 93.5    | 93.1              | 92.9  | 92.8  | 94.5  | 93.0  | 92.6  | 92.7  | 93.0  | 92.5  | 92.5  |       |
| op=15    | op=15             | op=20   | op=20             | op=22   | op=22             | op=21        | op=21             | op=28   | op=28             | op=30   | op=30             | op=31    | op=15             | op=15   | op=20             | op=20 | op=22 | op=22 | op=21 | op=21 | op=28 | op=28 | op=30 | op=30 | op=31 |

(a) Probing accuracies on the six tasks: can\_next, dep, known, nece, nece\_next, value.

| can_next(A) on negative labels when A is unnecessary |                   |         |                   |         |                   | can_next(A) on positive labels when A is unnecessary |                   |         |                   |         |                   | dep(A,B) on negative labels when A is unnecessary |                   |         |                   |       |       | dep(A,B) on positive labels when A is unnecessary |       |       |           |       |       |       |       |
|------------------------------------------------------|-------------------|---------|-------------------|---------|-------------------|------------------------------------------------------|-------------------|---------|-------------------|---------|-------------------|---------------------------------------------------|-------------------|---------|-------------------|-------|-------|---------------------------------------------------|-------|-------|-----------|-------|-------|-------|-------|
| iGSM-med                                             |                   |         | iGSM-hard         |         |                   | iGSM-med                                             |                   |         | iGSM-hard         |         |                   | iGSM-med                                          |                   |         | iGSM-hard         |       |       | iGSM-med                                          |       |       | iGSM-hard |       |       |       |       |
| in-dist                                              | out-of-dist (OOD) | in-dist | out-of-dist (OOD) | in-dist | out-of-dist (OOD) | in-dist                                              | out-of-dist (OOD) | in-dist | out-of-dist (OOD) | in-dist | out-of-dist (OOD) | in-dist                                           | out-of-dist (OOD) | in-dist | out-of-dist (OOD) |       |       |                                                   |       |       |           |       |       |       |       |
| 99.9                                                 | 99.3              | 99.8    | 98.8              | 98.5    | 98.2              | 99.3                                                 | 98.9              | 99.2    | 99.2              | 99.2    | 99.2              | 99.2                                              | 99.6              | 99.4    | 99.3              | 99.2  | 99.1  | 99.2                                              | 99.1  | 99.2  | 99.1      | 99.2  | 99.1  | 99.2  | 99.2  |
| 99.9                                                 | 99.5              | 99.5    | 99.5              | 99.5    | 99.5              | 99.5                                                 | 99.5              | 99.4    | 99.4              | 99.4    | 99.4              | 99.4                                              | 99.6              | 99.1    | 99.2              | 99.2  | 99.2  | 99.5                                              | 98.8  | 98.6  | 98.5      | 98.7  | 98.7  | 98.7  | 98.7  |
| 99.6                                                 | 98.8              | 98.8    | 98.8              | 98.7    | 98.9              | 99.1                                                 | 98.3              | 98.2    | 98.0              | 97.5    | 97.4              | 97.4                                              | 99.3              | 99.0    | 99.2              | 99.2  | 99.2  | 99.6                                              | 99.3  | 99.4  | 99.5      | 99.5  | 99.4  | 99.4  | 99.4  |
| 80.7                                                 | 79.2              | 81.2    | 79.9              | 79.8    | 80.9              | 79.9                                                 | 79.4              | 79.4    | 79.4              | 79.4    | 79.4              | 79.4                                              | 99.3              | 98.8    | 98.9              | 98.9  | 98.9  | 99.7                                              | 99.4  | 99.2  | 99.2      | 99.2  | 99.2  | 99.2  | 99.2  |
| op=15                                                | op=15             | op=20   | op=20             | op=22   | op=22             | op=21                                                | op=21             | op=28   | op=28             | op=30   | op=30             | op=31                                             | op=15             | op=15   | op=20             | op=20 | op=22 | op=22                                             | op=21 | op=21 | op=28     | op=28 | op=30 | op=30 | op=31 |

(b) Probing accuracies of can\_next(A), dep(A, B) restricted to pos/neg labels in which A is unnecessary

Figure 6: V-probing accuracies; experiment details are in Appendix F.2.

is done by introducing a trainable linear classifier on the hidden states and performing a lightweight finetuning task for this property (see Hewitt & Manning (2019) and references therein).

Our setting is more complex because the properties have one or two conditional variables,  $A$  and  $B$ , described in plain English. To handle this, we truncate the math problems to the probing position and append tokens [START] and [END] around the descriptions of  $A$  (or  $A, B$ ). We then probe from the token position of [END] to see if the property is linearly encoded at the last layer.

Unlike standard linear probing, to account for the input change, we introduce a small trainable rank-8 (linear) update on the input embedding layer. We freeze the pretrained language model and finetune both the linear classifier and the rank-8 update for the desired property. We refer to this as V(ariable)-probing and provide details in Appendix C. An illustration of the nece(A) probing task is shown in Figure 5.

We compute the V-probing accuracies on a language model pretrained from iGSM and compare them with the V-probing accuracies on a randomly-initialized transformer model. If the former accuracies are significantly higher, we conclude that the probing signals must have (or be very close to having) come from the pretrained weights, rather than the (lightweight) finetuning stage.

## 4.2 PROBING RESULTS AND FINDINGS

We present our probing results in Figure 6. The probing accuracies are high for all the tasks, compared to majority guess and random-model probing — except for the very hard OOD cases (i.e., for large op where the model’s generation accuracies fall down to 80% anyways in Figure 3),

**Result 4: model solves math problems like humans.** We make the following observations:

- When generating solutions, the model not only remembers which parameters have been computed and which have not (value, known) but also knows which parameters can be computed next (can\_next, nece\_next). These abilities ensure that the model can solve the given math problem step by step, similar to human problem-solving skills.
- By the end of the problem description, the model already knows the full list of necessary parameters (nece). This indicates that the model has learned to plan ahead, identifying necessary parameters before starting to generate the solution. This aligns with human behavior, except that the model plans mentally while humans typically write this down. This further confirms that the model reaches the “level-1” reasoning skill discussed in Section 3.

*Remark 4.1.* The mental process described can be compared to (out-of-context) knowledge manipulation (Allen-Zhu & Li, 2023b), which involves retrieving factual knowledge and performing single-step computations (e.g., retrieving two people’s birth dates to determine who was born earlier). Allen-Zhu & Li (2023b) found that even single-step computations cannot be performed mentally without a substantial number of pretrain samples. In contrast, this paper studies in-context reasoning and demonstrates that the model can execute very complex mental calculations.



**Result 5: model learns beyond human reasoning skills.** Remarkably, the model learns  $\text{dep}(A, B)$  and  $\text{can\_next}(A)$ , even for parameters  $A$  not necessary for answering the question, as shown in Figure 6(b). This differs from human problem-solving, where we typically use backward reasoning from the question to identify necessary parameters, often overlooking unnecessary ones (Rips, 1994). In contrast, language models pre-compute, for instance, the all-pair dependency graph  $\text{dep}(A, B)$  even *before* a question is raised. This is non-trivial, as the model must *dynamically update this graph* whenever a new dependency relationship is seen.<sup>14</sup> We consider this a “level-2” reasoning skill that is very different from human behavior or mental processes.

Note also, this skill is not needed for solving the math problems. Although no pretrain data teaches the model to compute “all-pair dependency” — fitting the data only requires computing necessary parameters — the model still discovers it after training. This enables the model to sort relationships among the things it hears, a skill that can be useful for future tasks (via instruction fine-tuning). To our knowledge, this may be the first evidence of a language model acquiring skills *beyond* those needed for learning its pretrain data. This may be a preliminary signal of where the G in AGI can come from (generalizing to skills not taught in the pretrain data).

**Corollary: the backward thinking process.** A key question for AGI success is whether the “backward thinking process” (e.g., “because I want to compute X, but X depends on Y and Y depends on Z, so let me compute Z first”) needs to be explicitly included in the training data. This differs from CoT, where CoT breaks down complex computations into simpler steps, but planning is still required to decide which step to compute first. Our findings suggest that, at least for grade-school math problems, with abundant data, this backward thinking process can be autonomously learned through language modeling, without needing to be directly included in the training data.

## 5 RESULT 6: EXPLAIN MODEL’S MISTAKES

Due to space limitations, we defer Result 6 to Appendix A, which categorizes the model’s erroneous behaviors in its generated solutions and connects them to our probing results. Probing reveals that some of the erroneous behaviors trace back to the model’s mental processing errors, which can occur long before the erroneous behavior manifests (specifically, before the model begins generating its solution). We also show that GPT-4/4o exhibit the same erroneous behaviors on our dataset, although we cannot probe their internal states. This finding actually motivates us to write a separate paper (also in submission to ICLR) regarding how to encourage models to correct their mistakes.

## 6 RESULT 7-8: DEPTH VS. REASONING LENGTH

Our controlled dataset enables a systematic exploration of the relationship between a language model’s depth and its reasoning length. Recent studies have demonstrated that for knowledge storage and extraction, only model size matters (even for 2-layer transformers) (Allen-Zhu & Li, 2024b). Furthermore, both the seminal scaling-law paper by OpenAI (Kaplan et al., 2020) and theoretical studies in deep learning such as (Allen-Zhu et al., 2019) suggest that model depth/width might have a minimal impact universally.

Contrary to these findings, we present evidence in Figure 7 that language model’s depth is crucial for mathematical reasoning (as Result 7).<sup>15</sup> Specifically, we experimented with models of depths 4/8/12/16/20 and two sizes (a smaller size 1 and a larger size 2).<sup>16</sup> From Figure 7, we observe that a 4-layer transformer, even with 1920 hidden dimensions, underperforms on our math datasets. Conversely, deeper but smaller models, such as a 20-layer 576-dim, perform very well. Comparing accuracies vertically reveals a clear correlation between model depth and performance. Thus, we infer that depth is likely essential for reasoning tasks, such as solving grade-school math problems.

<sup>14</sup>Before a question is raised, the model cannot tell if all the dependency statements (such as  $A$  is five times  $B$ ) have been given. Thus, the model has to pre-compute the all-pair dependency graph both before and after each sentence; adding a simple relationship such as  $A$  depends on  $B$  may result in cascading effects, so everything that depends on  $A$  must now also depend on everything that  $B$  depends on.

<sup>15</sup>Math reasoning only occupies a tiny fraction of pretraining data for language models, thus one might not observe a difference if we only look at the perplexity as in the original scaling law paper (Kaplan et al., 2020).

<sup>16</sup>GPT2- $\ell$ - $h$  represents an  $\ell$ -layer,  $h$ -head,  $64h$ -dimensional GPT2 model. Size-1 models are GPT2-4-21, GPT2-8-15, GPT2-12-12, GPT2-16-10, GPT2-20-9, with similar parameter counts; size-2 models are GPT2-4-30, GPT2-8-21, GPT2-12-17, GPT2-16-15, GPT2-20-13, approximately twice the size of size-1 models.

|                            | iGSM-med_pq |                   | iGSM-med_qp |                   | iGSM-hard_pq |                   | iGSM-hard_qp |                   | avg  |      |      |      |      |
|----------------------------|-------------|-------------------|-------------|-------------------|--------------|-------------------|--------------|-------------------|------|------|------|------|------|
|                            | in-dist     | out-of-dist (OOD) | in-dist     | out-of-dist (OOD) | in-dist      | out-of-dist (OOD) | in-dist      | out-of-dist (OOD) |      |      |      |      |      |
| 486 dep4 - size1 - head21  | 99.5        | 92.7              | 74.7        | 68.0              | 62.4         | 54.5              | 99.4         | 93.3              | 73.3 | 66.8 | 61.1 | 54.6 | 72.2 |
| 487 dep4 - size2 - head30  | 99.6        | 94.7              | 74.2        | 67.9              | 61.6         | 53.1              | 99.4         | 94.5              | 78.1 | 71.9 | 65.7 | 58.8 | 68.6 |
| 488 dep8 - size1 - head15  | 100         | 98.8              | 89.7        | 86.5              | 82.8         | 76.6              | 100          | 99.2              | 92.4 | 88.5 | 84.2 | 78.7 | 90.3 |
| 489 dep8 - size2 - head21  | 100         | 99.3              | 93.7        | 91.6              | 88.3         | 83.6              | 99.9         | 99.0              | 90.2 | 87.1 | 83.3 | 76.3 | 91.3 |
| 490 dep12 - size1 - head12 | 100         | 99.3              | 92.0        | 88.9              | 84.2         | 77.9              | 100          | 99.4              | 92.2 | 89.2 | 83.9 | 77.9 | 91.9 |
| 491 dep12 - size2 - head17 | 100         | 99.5              | 94.0        | 91.9              | 89.0         | 82.1              | 100          | 99.6              | 90.6 | 85.4 | 80.2 | 73.2 | 92.1 |
| 492 dep16 - size1 - head10 | 100         | 99.6              | 94.6        | 91.9              | 87.9         | 82.7              | 100          | 99.5              | 89.9 | 85.0 | 79.1 | 71.1 | 92.5 |
| 493 dep16 - size2 - head15 | 100         | 99.8              | 95.9        | 93.7              | 90.4         | 86.5              | 100          | 99.8              | 95.6 | 93.5 | 90.3 | 84.3 | 95.0 |
| 494 dep20 - size1 - head9  | 100         | 99.8              | 95.5        | 93.6              | 90.0         | 86.3              | 100          | 99.6              | 94.8 | 91.4 | 87.4 | 80.4 | 94.0 |
| 495 dep20 - size2 - head13 | 100         | 99.8              | 95.8        | 93.2              | 89.2         | 84.4              | 100          | 99.6              | 93.7 | 91.8 | 87.4 | 81.3 | 94.7 |

Figure 7: Accuracies for GPT2 models of different depth/widths pretrained on iGSM datasets, see Appendix F.

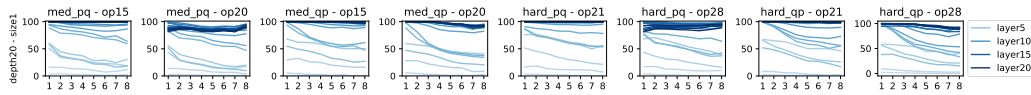Figure 8: Increasing probing accuracies of  $nece(A)$  with increasing layer depth. The x-axis denotes the distance of parameter  $A$  to the query parameter, with colors from light to dark to represent layers 1 to 20. This figure is for a 20-layer GPT2 model; for other model depths/sizes, see Figure 13.

Next, we try to reveal “why” this happens. We delved into how depth influences math problem-solving skills through the  $nece$  probing task, focusing on necessary parameters at distance  $t$  from the query parameter, for  $t \in \{1, 2, \dots, 8\}$ . These parameters all have  $nece(A) = true$ , but we can probe the model to see how correct they are at predicting  $nece(A)$  at different hidden layers.

Figure 8 shows our result. It reveals a correlation between the model’s layer hierarchy, reasoning accuracy, and *mental reasoning depth*. Shallower layers excel at predicting  $nece(A)$  for parameters  $A$  closer to the query, whereas deeper layers are more accurate and can predict  $nece(A)$  for parameters further from the query. This suggests that the model employs layer-by-layer reasoning during the planning phase to recursively identify all parameters the query depends on. Furthermore, the depth of a language model is crucial, likely due to the complexity of its hidden (mental) reasoning processes. A  $t$ -step mental reasoning, such as mentally computing  $nece(A)$  for parameters  $A$  that are a distance  $t$  from the query, may require deeper models for larger  $t$ , assuming all other hyperparameters remain constant.

We make two disclaimers here. First, if the “backward thinking process” is added as CoT to the data (see the end of Section 4.2), then deep mental thinking is no longer required, reducing the language model’s depth requirement. However, in practice, many such “thinking processes” may not be included in standard math solutions or languages in general. Second, the above claim does not imply that “a  $t$ -step mental thinking requires a depth- $t$  transformer”. A single-layer transformer (containing attention and MLP sub-layers) can implement  $t > 1$  mental thinking steps, though possibly with reduced accuracy (or requiring the hidden dimension to be extremely large) as  $t$  increases. We refrain from providing an exact correlation in this paper, as it heavily depends on the data distribution.

## 7 CONCLUSION

We use a synthetic setting to demonstrate that language models can learn to solve grade-school math problems through true generalization, rather than relying on data contamination or template memorization. We develop probing to examine the models’ hidden reasoning processes. Our findings reveal that these models can learn math skills aligned with human cognitive processes, as well as “new thinking processes” not present in the training data. Additionally, we explain why models make reasoning mistakes, and provide a principled approach to connect the model’s depth to its capable reasoning length. We believe this research opens doors to study the mathematical reasoning skills of language models from a different angle compared to pushing math benchmarks.

One may argue that iGSM may be very different from the pretrain data that modern LLMs use. While this may be true, we attempt to look into the future. Recall, even GPT-4/4o of today cannot few-shot learn to solve iGSM-med<sup>op=11</sup> (see Figure 2). From this perspective, it is reasonable to believe that future versions of LLMs will rely on synthetic math data to improve their reasoning skills. While one may not directly use iGSM, it is tempting to use existing LLMs to turn iGSM into more natural formats while keeping the logical chains. On the other hand, models trained purely on the iGSM data make similar mistakes compared to GPT-4/4o (see Appendix H); this further suggests that our findings do connect to practice, regarding the model’s hidden reasoning process.

## REFERENCES

- 540  
541  
542 Zeyuan Allen-Zhu and Yuanzhi Li. Physics of Language Models: Part 1, Learning Hierarchical  
543 Language Structures. *ArXiv e-prints*, abs/2305.13673, May 2023a. Full version available at  
544 <http://arxiv.org/abs/2305.13673>.
- 545 Zeyuan Allen-Zhu and Yuanzhi Li. Physics of Language Models: Part 3.2, Knowledge Manip-  
546 ulation. *ArXiv e-prints*, abs/2309.14402, September 2023b. Full version available at <http://arxiv.org/abs/2309.14402>.  
547
- 548 Zeyuan Allen-Zhu and Yuanzhi Li. Physics of Language Models: Part 3.1, Knowledge Storage  
549 and Extraction. In *ICML, 2024a*. Full version available at <http://arxiv.org/abs/2309.14316>.  
550
- 551 Zeyuan Allen-Zhu and Yuanzhi Li. Physics of Language Models: Part 3.3, Knowledge Capacity  
552 Scaling Laws. *ArXiv e-prints*, abs/2404.05405, April 2024b. Full version available at <http://arxiv.org/abs/2404.05405>.  
553
- 554 Zeyuan Allen-Zhu, Yuanzhi Li, and Zhao Song. A convergence theory for deep learning via over-  
555 parameterization. In *ICML, 2019*. Full version available at <http://arxiv.org/abs/1811.03962>.  
556
- 557 Cem Anil, Yuhuai Wu, Anders Andreassen, Aitor Lewkowycz, Vedant Misra, Vinay Ramasesh, Am-  
558 brose Slone, Guy Gur-Ari, Ethan Dyer, and Behnam Neyshabur. Exploring length generalization  
559 in large language models. *Advances in Neural Information Processing Systems*, 35:38546–38556,  
560 2022.
- 561 Sid Black, Stella Biderman, Eric Hallahan, Quentin Anthony, Leo Gao, Laurence Golding, Ho-  
562 race He, Connor Leahy, Kyle McDonell, Jason Phang, Michael Pieler, USVSN Sai Prashanth,  
563 Shivanshu Purohit, Laria Reynolds, Jonathan Tow, Ben Wang, and Samuel Weinbach. GPT-  
564 NeoX-20B: An open-source autoregressive language model. In *Proceedings of the ACL Work-  
565 shop on Challenges & Perspectives in Creating Large Language Models, 2022*. URL <https://arxiv.org/abs/2204.06745>.  
566
- 567 Sébastien Bubeck, Varun Chandrasekaran, Ronen Eldan, Johannes Gehrke, Eric Horvitz, Ece Ka-  
568 mar, Peter Lee, Yin Tat Lee, Yuanzhi Li, Scott Lundberg, et al. Sparks of artificial general  
569 intelligence: Early experiments with gpt-4. *arXiv preprint arXiv:2303.12712*, 2023.
- 570 Karl Cobbe, Vineet Kosaraju, Mohammad Bavarian, Mark Chen, Heewoo Jun, Lukasz Kaiser,  
571 Matthias Plappert, Jerry Tworek, Jacob Hilton, Reiichiro Nakano, et al. Training verifiers to  
572 solve math word problems. *arXiv preprint arXiv:2110.14168*, 2021.
- 573 Leo Gao, Stella Biderman, Sid Black, Laurence Golding, Travis Hoppe, Charles Foster, Jason  
574 Phang, Horace He, Anish Thite, Noa Nabeshima, et al. The pile: An 800gb dataset of diverse text  
575 for language modeling. *arXiv preprint arXiv:2101.00027*, 2020.
- 576 Suriya Gunasekar, Yi Zhang, Jyoti Aneja, Caio César Teodoro Mendes, Allie Del Giorno, Sivakanth  
577 Gopi, Mojan Javaheripi, Piero Kauffmann, Gustavo de Rosa, Olli Saarikivi, et al. Textbooks are  
578 all you need. *arXiv preprint arXiv:2306.11644*, 2023.
- 579 John Hewitt and Christopher D. Manning. A structural probe for finding syntax in word representa-  
580 tions. In *Proceedings of the 2019 Conference of the North American Chapter of the Association  
581 for Computational Linguistics: Human Language Technologies, Volume 1 (Long and Short Pa-  
582 pers)*, pp. 4129–4138, Minneapolis, Minnesota, June 2019. Association for Computational Lin-  
583 guistics. doi: 10.18653/v1/N19-1419. URL <https://aclanthology.org/N19-1419>.
- 584 Samy Jelassi, Stéphane d’Ascoli, Carles Domingo-Enrich, Yuhuai Wu, Yuanzhi Li, and François  
585 Charton. Length generalization in arithmetic transformers. *arXiv preprint arXiv:2306.15400*,  
586 2023.
- 587 Jared Kaplan, Sam McCandlish, Tom Henighan, Tom B Brown, Benjamin Chess, Rewon Child,  
588 Scott Gray, Alec Radford, Jeffrey Wu, and Dario Amodei. Scaling laws for neural language  
589 models. *arXiv preprint arXiv:2001.08361*, 2020.
- 590 Yuanzhi Li, Sébastien Bubeck, Ronen Eldan, Allie Del Giorno, Suriya Gunasekar, and Yin Tat Lee.  
591 Textbooks are all you need ii: phi-1.5 technical report. *arXiv preprint arXiv:2309.05463*, 2023.
- 592 Bingbin Liu, Sebastien Bubeck, Ronen Eldan, Janardhan Kulkarni, Yuanzhi Li, Anh Nguyen, Rachel  
593 Ward, and Yi Zhang. TinyGSM: achieving > 80% on GSM8k with small language models. *arXiv  
preprint arXiv:2312.09241*, 2023.

594 OpenAI. Gpt-4 technical report, 2023.  
595 Alec Radford, Jeffrey Wu, Rewon Child, David Luan, Dario Amodei, Ilya Sutskever, et al. Language  
596 models are unsupervised multitask learners. *OpenAI blog*, 1(8):9, 2019.  
597 Lance J Rips. *The psychology of proof: Deductive reasoning in human thinking*. Mit Press, 1994.  
598 Jianlin Su, Yu Lu, Shengfeng Pan, Bo Wen, and Yunfeng Liu. Roformer: Enhanced transformer  
599 with rotary position embedding, 2021.  
600 Hugh Zhang, Jeff Da, Dean Lee, Vaughn Robinson, Catherine Wu, Will Song, Tiffany Zhao, Pranav  
601 Raja, Dylan Slack, Qin Lyu, et al. A careful examination of large language model performance  
602 on grade school arithmetic. *arXiv preprint arXiv:2405.00332*, 2024.  
603 Hattie Zhou, Arwen Bradley, Etai Littwin, Noam Razin, Omid Saremi, Josh Susskind, Samy Bengio,  
604 and Preetum Nakkiran. What algorithms can transformers learn? a study in length generalization.  
605 *arXiv preprint arXiv:2310.16028*, 2023.  
606  
607  
608  
609  
610  
611  
612  
613  
614  
615  
616  
617  
618  
619  
620  
621  
622  
623  
624  
625  
626  
627  
628  
629  
630  
631  
632  
633  
634  
635  
636  
637  
638  
639  
640  
641  
642  
643  
644  
645  
646  
647

## APPENDIX

## A MISSING RESULT 6: EXPLAIN MODEL’S MISTAKES

|                                                                 |  | nece(A)  |       |       |       |       |       |       |       |           |       |       |          |          |          |          |          |           |           |           |           |           |           |
|-----------------------------------------------------------------|--|----------|-------|-------|-------|-------|-------|-------|-------|-----------|-------|-------|----------|----------|----------|----------|----------|-----------|-----------|-----------|-----------|-----------|-----------|
|                                                                 |  | IGSM-med |       |       |       |       |       |       |       | IGSM-hard |       |       |          |          |          |          |          |           |           |           |           |           |           |
| on all parameters   pq                                          |  | 99.8%    | 98.7% | 97.9% | 96.9% | 94.7% | 99.6% | 99.1% | 98.6% | 97.9%     | 97.1% | 95.5% | 93.4%    | 94.9%    | 95.7%    | 95.6%    | 95.9%    | 89.6%     | 89.9%     | 90.5%     | 91.6%     | 92.0%     | 92.0%     |
| on all parameters   pq (reask)                                  |  | 99.9%    | 99.5% | 99.4% | 99.3% | 99.2% | 99.8% | 99.7% | 99.7% | 99.6%     | 99.4% | 99.3% | 98.5%    | 98.1%    | 98.3%    | 98.5%    | 98.2%    | 96.6%     | 96.1%     | 96.6%     | 97.1%     | 97.2%     | 97.2%     |
| on all parameters   qp                                          |  | 31.6%    | 38.6% | 49.2% | 40.5% | 35.9% | 20.5% | 17.1% | 18.6% | 21.6%     | 23.2% | 23.6% | -105/232 | -188/435 | -224/435 | -206/509 | -161/449 | -262/1280 | -229/1314 | -245/1340 | -236/1391 | -364/1570 | -370/1566 |
| on unnecessary parameter in model’s output   pq (reask)   beam1 |  | 30.3%    | 38.1% | 45.8% | 40.5% | 34.7% | 19.7% | 16.5% | 18.4% | 20.3%     | 23.3% | 23.3% | -92/304  | -167/438 | -204/445 | -217/536 | -169/487 | -252/1280 | -219/1326 | -242/1316 | -272/1353 | -355/1523 | -348/1496 |
| on unnecessary parameter in model’s output   pq (reask)   beam4 |  | 21.7%    | 22.5% | 24.0% | 21.6% | 21.7% | 17.0% | 22.3% | 21.1% | 21.0%     | 18.9% | 24.7% | -49/373  | -124/553 | -145/608 | -118/546 | -125/575 | -193/1133 | -200/1165 | -234/1108 | -303/1443 | -243/1285 | -367/1684 |
| on unnecessary parameter in model’s output   qp (reask)   beam1 |  | 21.8%    | 22.5% | 22.6% | 21.1% | 20.6% | 17.1% | 22.6% | 23.1% | 21.6%     | 19.0% | 25.0% | -80/367  | -126/560 | -133/588 | -120/569 | -123/597 | -194/1136 | -254/1125 | -251/1085 | -304/1405 | -252/1325 | -375/1498 |
| on unnecessary parameter in model’s output   qp (reask)   beam4 |  |          |       |       |       |       |       |       |       |           |       |       |          |          |          |          |          |           |           |           |           |           |           |
|                                                                 |  | op=15    | op=20 | op=21 | op=22 | op=23 | op=21 | op=28 | op=29 | op=30     | op=31 | op=32 |          |          |          |          |          |           |           |           |           |           |           |

(a)  $nece(A)$  probing accuracies correlate with model’s outputted unnecessary parameters

|                                   |  | can_next(A) |          |          |          |           |          |          |          | nece_next(A) |          |          |          |           |          |          |          |          |          |
|-----------------------------------|--|-------------|----------|----------|----------|-----------|----------|----------|----------|--------------|----------|----------|----------|-----------|----------|----------|----------|----------|----------|
|                                   |  | IGSM-med    |          |          |          | IGSM-hard |          |          |          | IGSM-med     |          |          |          | IGSM-hard |          |          |          |          |          |
| on all parameters   pq            |  | 99.3%       | 99.2%    | 99.1%    | 99.0%    | 99.1%     | 99.0%    | 99.0%    | 98.9%    | 98.9%        | 99.2%    | 99.1%    | 99.0%    | 98.7%     | 98.7%    | 98.6%    | 98.4%    | 98.3%    | 98.3%    |
| on all parameters   qp            |  | 98.8%       | 98.6%    | 98.7%    | 98.5%    | 99.1%     | 99.0%    | 99.0%    | 99.0%    | 99.0%        | 98.7%    | 98.3%    | 98.3%    | 97.7%     | 99.5%    | 99.4%    | 99.3%    | 99.2%    | 99.2%    |
| on first wrong param   pq   beam1 |  | 75.8%       | 75.6%    | 69.6%    | 70.9%    | 57.1%     | 58.2%    | 60.7%    | 63.7%    | 62.5%        | 52.2%    | 47.6%    | 41.6%    | 42.5%     | 42.9%    | 40.9%    | 45.4%    | 46.4%    | 47.2%    |
| on first wrong param   pq   beam4 |  | -172/227    | -270/357 | -330/474 | -473/667 | -128/224  | -185/318 | -229/377 | -332/521 | -419/670     | -119/228 | -171/359 | -197/474 | -284/669  | -96/224  | -130/318 | -171/377 | -242/522 | -317/671 |
| on first wrong param   qp   beam1 |  | 76.6%       | 76.3%    | 70.4%    | 69.8%    | 61.3%     | 59.9%    | 62.9%    | 66.8%    | 63.3%        | 51.6%    | 47.2%    | 44.9%    | 43.3%     | 39.6%    | 40.3%    | 45.5%    | 46.4%    | 48.8%    |
| on first wrong param   qp   beam4 |  | -187/244    | -260/367 | -330/497 | -491/689 | -141/230  | -187/312 | -246/391 | -356/533 | -439/694     | -162/244 | -174/369 | -224/497 | -300/693  | -91/230  | -116/313 | -178/391 | -248/534 | -339/695 |
| on first wrong param   qp   beam1 |  | 68.1%       | 65.2%    | 66.5%    | 67.8%    | 59.2%     | 59.4%    | 62.4%    | 60.5%    | 61.9%        | 51.3%    | 56.1%    | 56.5%    | 59.4%     | 50.5%    | 50.6%    | 52.8%    | 52.8%    | 57.3%    |
| on first wrong param   qp   beam4 |  | -190/279    | -234/359 | -354/532 | -503/742 | -119/201  | -149/251 | -204/327 | -259/428 | -313/506     | -143/279 | -202/360 | -301/533 | -443/746  | -102/202 | -127/251 | -173/327 | -226/428 | -290/506 |
| on first wrong param   qp   beam4 |  | 63.9%       | 67.7%    | 65.7%    | 69.7%    | 63.0%     | 59.5%    | 61.1%    | 57.8%    | 60.9%        | 54.6%    | 60.4%    | 56.3%    | 60.6%     | 54.5%    | 51.4%    | 56.3%    | 54.9%    | 55.0%    |
|                                   |  | -190/280    | -249/368 | -352/536 | -524/752 | -131/208  | -148/253 | -214/334 | -256/443 | -310/509     | -153/280 | -223/369 | -302/536 | -458/756  | -114/209 | -130/253 | -188/334 | -243/443 | -285/509 |
|                                   |  | op=20       | op=21    | op=22    | op=23    | op=28     | op=29    | op=30    | op=31    | op=32        | op=20    | op=21    | op=22    | op=23     | op=28    | op=29    | op=30    | op=31    | op=32    |

(b)  $can\_next(A)$  and  $nece\_next(A)$  probing accuracies correlate with model’s outputted wrong solutions

Figure 9: Probing results correlate with model’s output solutions. We tested 4096 math problems and presented the probing accuracies restricted to (1) unnecessary parameters in the model’s correct output solution (top), and (2) the first wrong parameter in model’s wrong output solution (bottom). Details are in Appendix F.2.

We further examine the relationship between our probing results and the model’s generated solutions, focusing on two questions: (1) When does the model answer correctly but include unnecessary parameters? (2) What causes incorrect answers? We aim to determine if such erroneous behavior of the model aligns with errors in the model’s mental process (via probing).

For the first question, given the model rarely produces solutions longer than necessary (see Figure 3), we turned to out-of-distribution `reask` data for evaluation.<sup>17</sup> On this data, pretrained models produce an average of  $\sim 0.5$  unnecessary parameters per solution even for  $op = 32$  (see Figure 3). We examined if these unnecessary parameters  $A$  were **incorrectly predicted as  $nece(A) = true$**  in the probing task. Figure 9(a) reveals that this is often indeed the case, thus language models produce solutions with unnecessary steps due to errors in their *mental planning phase*.

For the second question, we focused on the model’s *wrong* solutions and their *first wrong parameters*. (Using synthetic data, we can easily identify such parameters.) Our findings in Figure 9(b) show that the model’s errors mainly stem from **incorrectly predicting  $nece\_next(A)$  or  $can\_next(A)$  as true** in its internal states when such  $A$ ’s are not ready for computation.<sup>18</sup>

**Result 6** (Figure 9). *Combining these, we conclude:*

- Many reasoning mistakes made by the language model are systematic, stemming from **errors in its mental process**, not merely random from the generation process.
- Some of the model’s mistakes can be discovered by probing its inner states **even before the model opens its mouth** (i.e., before it says the first solution step).

<sup>17</sup>Recall this re-samples a query after generating the problem, leading to a different set of necessary parameters.

<sup>18</sup>In Figure 9(b), we focus on these “first wrong parameters” with correct label being  $can\_next(A) = false$  or  $nece\_next(A) = false$  and present the probability that their probing also correctly predicts false. Low accuracy indicates that the model “thought” these parameters were ready for computation, but they were not.

We also observe that GPT-4/4o makes similar mistakes by outputting unnecessary parameters or insisting on computing parameters  $A$  with `can_next(A) = false` (see Appendix H). This further hints that our findings may be applicable more broadly.

## B RESULT 1 — AN EXAMPLE IN IGSM-HARD WITH $OP = 21$

**(Problem - A Hard Example)** The number of each Jungle Jim's International Market's Cheese equals the sum of each Parmesan Cheese's Pear and each The Fresh Market's Ice Cream. The number of each Ice Cream's Pineapple equals 2 more than each Goat Cheese's Grape. The number of each New Seasons Market's Goat Cheese equals the sum of each Residential College District's Jungle Jim's International Market, each Jungle Jim's International Market's Parmesan Cheese and each Residential College District's Supermarket. The number of each Arts Campus's New Seasons Market equals each Cheese's Pineapple. The number of each Goat Cheese's Banana equals each Vocational School District's Product. The number of each Residential College District's Jungle Jim's International Market equals 5 more than each Ice Cream's Grape. The number of each Parmesan Cheese's Pineapple equals each Parmesan Cheese's Pear. The number of each Residential College District's The Fresh Market equals each Arts Campus's Trader Joe's. The number of each Arts Campus's Trader Joe's equals each Parmesan Cheese's Ingredient. The number of each Goat Cheese's Grape equals 0. The number of each The Fresh Market's Ice Cream equals 13 more than the difference of each Residential College District's The Fresh Market and each Parmesan Cheese's Grape. The number of each Goat Cheese's Pineapple equals each New Seasons Market's Product. The number of each Vocational School District's The Fresh Market equals the sum of each Trader Joe's's Cheese and each The Fresh Market's Cheese. The number of each Trader Joe's's Cheese equals 6. The number of each The Fresh Market's Cheese equals 3. The number of each Jungle Jim's International Market's Ice Cream equals the difference of each Ice Cream's Banana and each Goat Cheese's Grape. The number of each Jungle Jim's International Market's Parmesan Cheese equals each Ice Cream's Pineapple. The number of each Parmesan Cheese's Pear equals the difference of each Goat Cheese's Grape and each Ice Cream's Grape. The number of each Parmesan Cheese's Grape equals 12 times as much as each Residential College District's Jungle Jim's International Market. The number of each The Fresh Market's Parmesan Cheese equals each The Fresh Market's Cheese. The number of each Ice Cream's Banana equals the sum of each Parmesan Cheese's Pineapple and each Ice Cream's Pineapple. The number of each School District's Jungle Jim's International Market equals each The Fresh Market's Ice Cream. The number of each Cheese's Pineapple equals 20 more than the sum of each Trader Joe's's Cheese and each The Fresh Market's Cheese. The number of each Trader Joe's's Parmesan Cheese equals 16. The number of each Ice Cream's Pear equals 8. The number of each Ice Cream's Grape equals each Goat Cheese's Grape. *How many Product does School District have?*

**(Solution - A Hard Example)** Define Goat Cheese's Grape as  $u$ ; so  $u = 0$ . Define Ice Cream's Grape as  $x$ ; so  $x = u = 0$ . Define Residential College District's Jungle Jim's International Market as  $N$ ; so  $N = 5 + x = 5 + 0 = 5$ . Define Parmesan Cheese's Pear as  $G$ ; so  $G = u - x = 0 - 0 = 0$ . Define Parmesan Cheese's Grape as  $f$ ; so  $f = 12 * N = 12 * 5 = 14$ . Define Parmesan Cheese's Pineapple as  $C$ ; so  $C = G = 0$ . Define Parmesan Cheese's Ingredient as  $Z$ ;  $e = f + C = 14 + 0 = 14$ ; so  $Z = e + G = 14 + 0 = 14$ . Define Arts Campus's Trader Joe's as  $q$ ; so  $q = Z = 14$ . Define Residential College District's The Fresh Market as  $j$ ; so  $j = q = 14$ . Define Ice Cream's Pineapple as  $X$ ; so  $X = 2 + u = 2 + 0 = 2$ . Define Ice Cream's Banana as  $K$ ; so  $K = C + X = 0 + 2 = 2$ . Define The Fresh Market's Ice Cream as  $P$ ;  $i = j - f = 14 - 14 = 0$ ; so  $P = 13 + i = 13 + 0 = 13$ . Define Jungle Jim's International Market's Ice Cream as  $R$ ; so  $R = K - u = 2 - 0 = 2$ . Define School District's Jungle Jim's International Market as  $V$ ; so  $V = P = 13$ . Define Jungle Jim's International Market's Cheese as  $v$ ; so  $v = G + P = 0 + 13 = 13$ . Define Jungle Jim's International Market's Parmesan Cheese as  $S$ ; so  $S = X = 2$ . Define Jungle Jim's International Market's Product as  $y$ ;  $U = S + R = 2 + 2 = 4$ ; so  $y = U + v = 4 + 13 = 17$ . Define School District's Product as  $J$ ; so  $J = V * y = 13 * 17 = 14$ . *Answer: 14.*

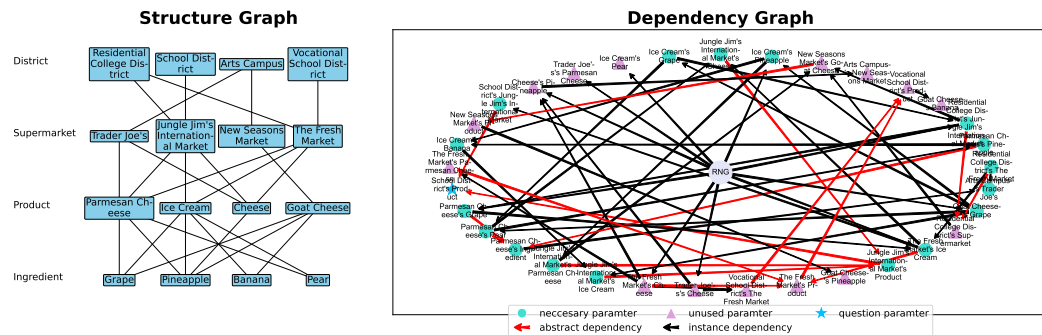

Figure 10: An example with  $op = 21$  in  $igsm-hard_{pq}$  used for training. Don't forget during testing we evaluate models on  $op = 32$  which is even much harder.



|                                       | dep(A,B) on negative labels   |                                    | dep(A,B) on positive labels   |                                    | nece_next(A) on negative labels |                                         | nece_next(A) on positive labels |                                         |
|---------------------------------------|-------------------------------|------------------------------------|-------------------------------|------------------------------------|---------------------------------|-----------------------------------------|---------------------------------|-----------------------------------------|
|                                       | QWV head                      | QWV head                           | QWV head                      | QWV head                           | QWV head                        | QWV head                                | QWV head                        | QWV head                                |
| pretrained model probing (qa)         | 99.7 99.1 99.0 99.1 99.1 99.1 | 99.6 98.8 98.5 98.5 98.7 98.7      | 99.7 99.6 99.5 99.5 99.4 99.5 | 99.3 99.3 99.2 99.2 99.2 99.2      | 99.9 99.5 99.2 99.2 99.2 99.1   | 99.7 99.3 99.1 99.0 99.0 99.1           | 99.7 99.3 99.5 99.5 94.3 93.3   | 99.2 98.4 98.5 93.6 92.9 93.4 90.4      |
| pretrained model probing (qa) - reask | 99.7 99.1 99.0 99.1 99.1 99.1 | 99.6 98.9 98.6 98.5 98.7 98.6 98.7 | 99.7 99.6 99.5 99.5 99.4 99.5 | 99.3 99.3 99.2 99.2 99.2 99.2      | 99.6 98.9 98.8 98.8 98.9 98.9   | 99.9 97.9 97.7 97.7 97.8 97.9 97.8      | 99.7 99.3 99.5 99.5 96.2 95.5   | 99.0 97.2 96.6 96.2 96.6 95.7 95.5 95.3 |
| pretrained model probing (qp)         | 99.4 98.8 98.8 98.8 98.9 99.1 | 99.7 99.3 99.2 99.1 99.2 99.3 99.3 | 99.0 98.4 98.1 98.0 97.9 98.1 | 99.6 99.4 99.3 99.2 99.1 99.2 99.1 | 99.7 99.3 99.0 98.9 98.8 98.7   | 99.9 98.8 98.6 98.5 99.5 99.5 99.4      | 97.7 95.9 98.0 89.3 87.8 88.6   | 98.7 99.4 97.7 97.7 97.6 96.2 95.7      |
| pretrained model probing (qp) - reask | 99.4 98.8 98.8 98.8 98.9 99.1 | 99.7 99.3 99.2 99.1 99.2 99.3 99.3 | 99.0 98.4 98.0 98.0 98.1 98.1 | 99.6 99.4 99.3 99.2 99.1 99.2 99.1 | 99.6 98.4 98.0 98.0 98.1 98.1   | 99.6 99.4 99.3 99.2 99.1 99.1 99.2 99.2 | 98.9 95.1 92.9 92.9 91.0 90.7   | 98.2 97.2 96.3 96.3 95.9 95.9 95.9      |

Figure 11: Probing accuracies *restricted* to positives/negatives labels (complement to Figure 6 which is on all labels.)

## C RESULTS 4-5 — DETAILS ON V-PROBING

Recall that we wish to conduct probing at the end of the problem description for the `nece` and `dep` tasks (before the solution for `nece`; before the solution or even the question for `dep`). For other tasks, we probe at the end of *every* solution sentence (including the start of the first solution sentence). The goal is to *freeze* a pretrained language model, then introduce a *very small* number of additional trainable parameters on top of it, and finetune them for each probing task.

Specifically, we take a pretrained language model, e.g., pretrained from the `iGSM-hard` training data. We *freeze* its parameters completely except for adding a trainable rank- $r$  update on the embedding layer to account for the task change (from next-token prediction to probing). Throughout this paper we use a small value  $r = 8$ . We feed this network with training data that are the same as `iGSM-hard`, but truncated at exactly the position we wish to probe. Importantly, we append such inputs with a special starting token `[START]` along with a parameter name (or two names, if it is the `dep(A, B)` task). We then extract the hidden states of the last token position at the last transformer layer, and add a trainable linear layer (a.k.a. linear head) to perform classification for one of the six probing tasks.

This probing method is illustrated in Figure 12. We call it V(ariale)-Probing, because it can take an arbitrary number of variables (i.e., parameters in this paper) to allow us to perform functional probing inside the transformer.

Note, if it were only a trainable linear head such probing would be called linear probing (Hewitt & Manning, 2019). Unlike traditional linear probing, we are adding a small low-rank update on the model’s embedding layer. This is arguably the minimum change needed (to account for the task change, for special tokens like `[START]` `[MID]` `[END]`, etc.) in order to perform any non-trivial probing. This is related but different from the nearly-linear probing methods introduced in Allen-Zhu & Li (2023a; 2024a), because they do not support taking variables as probing inputs.

**Unbalanced probing tasks.** Our probing accuracies for the six tasks were presented in Figure 6. Note however, the `dep` and `nece_next` tasks have unbalanced labels — even guessing “all false” would give 83% accuracy for `dep(A, B)` and 92% for `nece_next(A)`. For such reason, we also present their (high) probing accuracies restricted to positives/negatives labels separately in Figure 11.

### C.1 PROBING DATA PREPARATION

We describe here how we prepare the probing data. We generate math data according to Appendix E.

For each problem and each probing task (such as `nece(A)`, `dep(A, B)`, etc), we need to specify two things: at which position to probe and what parameters  $A$  (or  $A, B$ ) to probe.

- For `nece` and `dep`, the probing always takes place at the end of the problem (and question) description, so there is no choice to be made; for `value`, `can_next`, `nece_next` tasks, the probing can take place at the end of *each* sentence in the solution for (including the beginning of the first solution sentence), and we uniformly at random make such choices.
- Each parameter  $A$  (or  $B$ ) can be uniformly at random chosen from the set of all (instance or abstract) parameters in our dependency graph (with the only requirement that  $A \neq B$ ).

In the end, we make sure for each problem and each probing task, we make at most 10 such random choices (over the position and the choice of parameters) and sample without replacement.

Just like in the pretrain data, we prepare our probing data so that only problems with hash values of their solution template (see Footnote 9) where the hash  $< 17 \pmod{23}$  are included in the training set, and the rest are used for testing.

810  
811  
812  
813  
814  
815  
816  
817  
818  
819  
820  
821  
822  
823  
824  
825  
826  
827  
828  
829  
830  
831  
832  
833  
834  
835  
836  
837  
838  
839  
840  
841  
842  
843  
844  
845  
846  
847  
848  
849  
850  
851  
852  
853  
854  
855  
856  
857  
858  
859  
860  
861  
862  
863

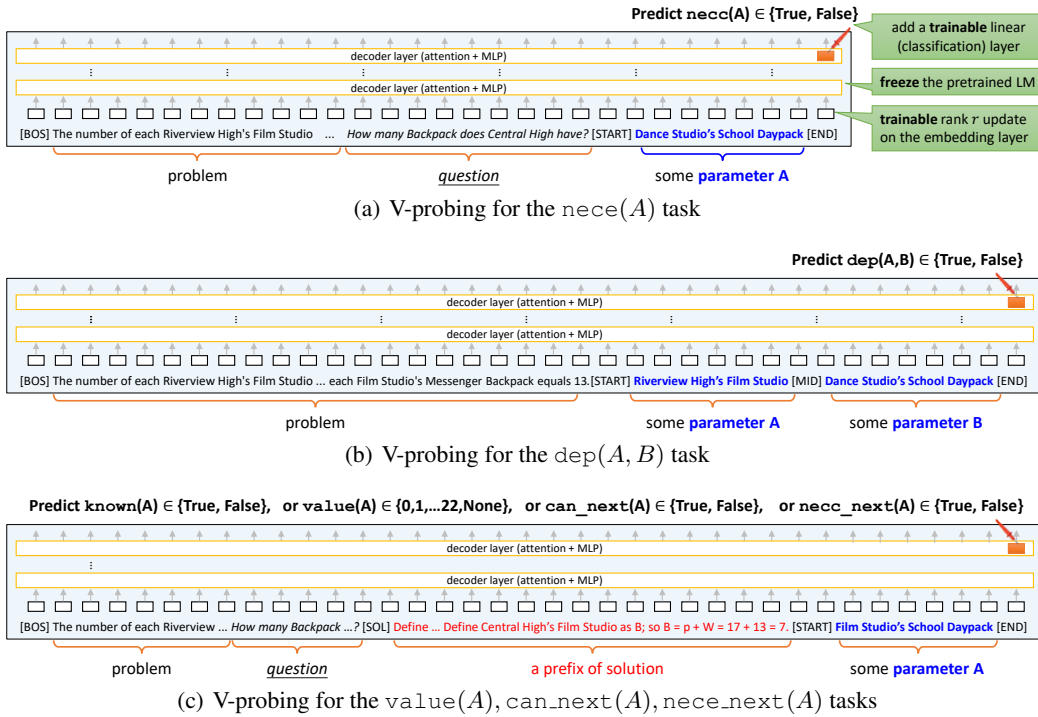

Figure 12: Illustrations of V-probing, our nearly-linear probing methods to investigate whether a pretrained model, at a specific input position, *knows* an arbitrary  $func(A)$  for a parameter  $A$  described in text.

In all cases, we freeze the entire pretrained language model, except for a low-rank  $r = 8$  update on the input embedding layer to accommodate the task change.

The illustration is for pq data (problem precedes question); for qp data, we simply reverse the order, except for  $dep(A, B)$  where the question is added before the problem.

## D RESULT 8 — ADDITIONAL FIGURE

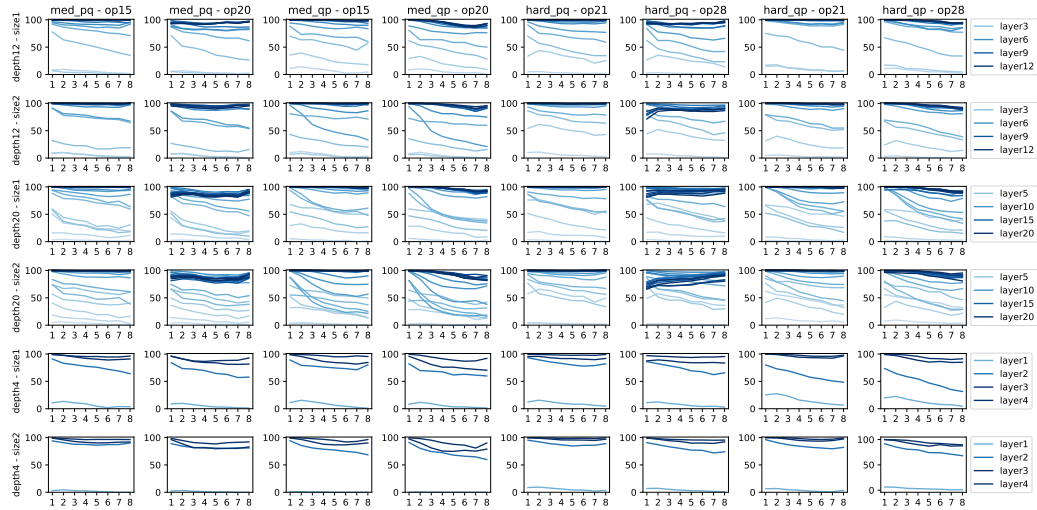

Figure 13: Increasing probing accuracies of  $nECE(A)$  with increasing layer depth. This is an extension of Figure 8 but including more model depths/sizes. The x-axis denotes the distance  $t$  of parameter  $A$  from the query parameter for  $t = 1 \dots 8$ . The colors transition from light to dark to represent layers 1 to max. (Model architecture details are in Footnote 16 and Appendix F.)

**Remark.** It is not surprising to see in some cases (e.g., iGSM-hard<sub>pq</sub> for depth-20 and size-2), for deeper layers, the probing accuracy of  $nECE(A)$  actually increases as the distance  $t$  increases; in such cases, the information of  $nECE(A)$  for smaller  $t$  is stored (relatively better) in lower layers.

## E RESULT 1 DETAILS — MATH DATA GENERATION

Our math data generation process consists of first generating the structure graph (see Figure 1 and 10 left), which defines the set of parameters we shall use; then generating the dependency graph (see Figure 1 and 10 right), which defines the arithmetic relationship between the parameters; and finally generating the English problem and solution descriptions.

**Notations.** In this section, to make the description concise, when we say “randomly sampling” in the pseudocode, we mean uniform random unless otherwise noted. Whenever we consider a (directed) graph  $G$ , slightly abusing notation, we write  $a \in G$  to indicate that  $a$  is a vertex in  $G$  and  $(a \rightarrow b) \in G$  to indicate that there is an edge from  $a$  to  $b$  in  $G$ .

### E.1 GENERATE STRUCTURE GRAPH

Recall the structure graph (see Figure 1 and 10 left) describes the set of possible items (nodes) and instance parameter (edges) that we shall rely on to construct our math problem.

We use  $G_s$  to denote such structure graph, and it is generated  $G_s = \text{DrawStructure}(e, d, w_0, w_1)$  from a random distribution defined with *hyperparameters*  $e, d, w_0, w_1 \in \mathbb{N}$ . At a high level, we construct  $G_s$  so that it has  $d$  layers,  $e$  edges, and each layer has between  $w_0$  and  $w_1$  items.

Specifically, suppose  $l_i \in \{w_0, w_0 + 1, \dots, w_1\}$  represents the number of items for each layer  $i$ . In this configuration, one must have at least  $e^- = l_2 + \dots + l_d$  edges to ensure the graph is “connected”, and at most  $e^+ = l_1 l_2 + \dots + l_{d-1} l_d$  edges. Using this formula, we first randomly choose a configuration  $(l_1, \dots, l_d)$  so that  $e^- \leq e \leq e^+$  for the given parameter  $e$ . Then, after the configuration is chosen, we randomly generate edges accordingly. Details are given in Algorithm 1.

---

#### Algorithm 1 $G_s = \text{DrawStructure}(e, d, w_0, w_1)$

---

**Input:**  $e, d, w_0, w_1 \in \mathbb{N}$   $\diamond$  satisfying  $2 \leq d \leq 4; 2 \leq w_0 \leq w_1 \leq 4; (d-1)w_0 \leq e \leq (d-1)w_1^2$

- 1:  $l \leftarrow (w_0, w_0, \dots, w_0) \in \mathbb{Z}^d$   $\diamond$   $l_i$  represents the number of items (nodes) for layer  $i$
- 2:  $p \leftarrow$  uniform random from  $(0, 1)$
- 3: **while**  $l \neq (w_1, w_1, \dots, w_1)$  **do**
- 4:  $e^-, e^+ \leftarrow$  minimum and maximum number of edges that  $l$  can give
- 5: **if**  $e^+ < e$  **then**
- 6: | randomly select  $i \in [d]$  such that  $l_i < w_1$ , and increase it  $l_i \leftarrow l_i + 1$ .
- 7: **else if**  $e^- = e$  **then**
- 8: | **break**
- 9: **else if** randomly choose a number in  $(0, 1)$  and it is less than  $p$  **then**
- 10: | randomly select  $i \in [d]$  such that  $l_i < w_1$ , and increase it  $l_i \leftarrow l_i + 1$ .
- 11: **else**
- 12: | **break**
- 13: **end**  $\diamond$  after while loop, we must have  $e^- \leq e \leq e^+$  and  $\forall i \in [d]: w_0 \leq l_i \leq w_1$
- 14: Construct  $G_s$  with exactly  $l_i$  items on layer  $i \in [d]$ .
- 15: **for** each item  $a$  in each layer  $i \geq 2$  **do**
- 16: | randomly select an item  $b$  in layer  $i - 1$  and connect  $(a, b)$  in  $G_s$ .  $\diamond$  this creates  $e^-$  edges
- 17: **while** number of edges  $< e$  **do**
- 18: | randomly select two items  $a, b$  from adjacent layers to create an edge in  $G_s$ .
- 19: **return**  $G_s$  and attach English to it.

---

#### E.1.1 ATTACH ENGLISH

As described in Section 2.1, we have prepared 4 predefined hierarchical categorizations, each of them with 4 total layers of categories:

```
[
  ["District", "Supermarket", "Product", "Ingredient"],
  ["Zoo", "Enclosure", "Animal", "Bone"],
  ["School", "Classroom", "Backpack", "Stationery"],
  ["Ecosystems", "Creatures", "Organs", "Cells"]
]
```

In each of the above 16 categories, we have prepared around 100 items (further decomposed into 5 sub-categories). Below is a showcase of them:

```

{
  "District": {
    "Residential Districts": [...],
    "Commercial Districts": [
      "Shopping District", "Business District", "Financial District", "Industrial District",
      "Warehouse District", "Market District", "Restaurant District", "Entertainment District",
      "Arts District", "Fashion District", "Silicon Valley", "Wall Street",
      "Tech Park", "Automotive District", "Jewelry District", "Medical District",
      "Legal District", "Media District", "Research Park", "Manufacturing District"
    ],
    "Historical Districts": [...],
    "Educational Districts": [...],
    "Government Districts": [...]
  },
  "Supermarket": {...},
  "Product": {
    "Canned Foods": [...],
    "Snack Foods": [
      "Potato Chips", "Pretzels", "Popcorn", "Candy Bars",
      "Gummy Candy", "Cookies", "Crackers", "Granola Bars",
      "Fruit Snacks", "Cheese Puffs", "Nuts", "Trail Mix",
      "Beef Jerky", "Rice Cakes", "Yogurt Covered Raisins", "Chocolate Covered Pretzels",
      "Tortilla Chips", "Salsa", "Hummus", "Dried Fruit"
    ],
    "Beverages": [...],
    "Baked Goods": [...],
    "Dairy Products": [...]
  },
  "Ingredient": {...},
  "Zoo": {...},
  "Enclosure": {...},
  "Animal": {...},
  "Bone": {...},
  "School": {...},
  "Classroom": {...},
  "Backpack": {...},
  "Stationery": {...},
  "Ecosystems": {...},
  "Creatures": {...},
  "Organs": {...},
  "Cells": {...}
}

```

Now, given a constructed structure graph  $G_s$ , we first randomly pick one of the four categorizations, then randomly pick  $d \in \{2, 3, 4\}$  consecutive layers of categories, next randomly pick one of the five subcategories, and finally pick  $l_i$  random item names in this subcategory for each layer  $i$ .

At this point, we have constructed  $G_s$  as well as added English names to each of its node, just like Figure 1 and 10 (left).

## E.2 GENERATE DEPENDENCY GRAPH

A structure graph  $G_s$  defines the set of possible parameters we consider, while a *dependency graph* defines how these parameters depend on each other. We use an edge  $a \rightarrow b$  to indicate that parameter  $b$  depends on  $a$ ; there is a special vertex RNG and it can happen that  $\text{RNG} \rightarrow b$ . What an abstract parameter depends on is inherited from the structure graph  $G_s$ . For each instance parameter, we shall randomly add edges to indicate what parameters it depends on.

**High-level plan.** We shall use  $G_d$  to denote the dependency graph, we start from an empty graph and then add vertices/edges incrementally and randomly. Our process is as follows:

- Generate a *necessary dependency graph*  $G_d^{\text{neces}}$  which covers all the vertices and nodes that are necessary for the computation of the query parameter.
  - Generate necessary abstract parameters (and add parameters they depend on); call this graph  $G_d^{\text{neces1}}$ .
  - Generate necessary instance parameters and add them to  $G_d^{\text{neces1}}$ ; call this graph  $G_d^{\text{neces2}}$ .
  - Generate a topological order for parameters  $G_d^{\text{neces2}}$  and ensure all of them are necessary towards computing the query parameter (which is the last one in this topologic order). During this process, we shall add additional edges from  $G_d^{\text{neces2}}$  to create  $G_d^{\text{neces3}}$ .
  - Generate additional necessary edges and add them to  $G_d^{\text{neces3}}$ ; call this graph  $G_d^{\text{neces}}$ .
- Add to  $G_d^{\text{neces}}$  all the remaining (unnecessary) parameters and edges to form  $G_d$ .

At a high level, our problem description shall solely depend on  $G_d$  — by describing each instance parameter in it using a sentence, and our solution description shall solely depend on  $G_d^{\text{nece}}$  — by describing the computation of each parameter in it using a sentence.

Before we proceed with the construction let us formally introduce:

**Definition E.1** (operation). *Given any dependency graph  $G_d$ ,*

- For an (abstract or instance) parameter  $a \in G_d$  that has in-degree  $t \geq 0$ , we define  $\text{op}_{G_d}(a) := \max\{1, t - 1\}$  which is the number of operations needed to compute  $a$ .<sup>19</sup>
- We use  $\text{op}(G_d) := \sum_{a \in G_d \setminus \{\text{RNG}\}} \text{op}_{G_d}(a)$  to denote the total number of (arithmetic) operations needed to compute all the parameters in  $G_d$ .

*Remark E.2.* In our final design of  $G_d$ , we shall ensure that each parameter (except the special vertex RNG) has in-degree at least 1; however, during the construction process since we add edges incrementally, some (instance) parameter may temporarily have in-degree 0. For notation simplicity, we still say  $\text{op}_{G_d}(a) = \max\{1, -1\} = 1$  in such a case.

**Hyperparameters.** We use hyperparameters  $1 \leq n \leq m \leq s$  to control the difficulty of  $G_d$ .

- we shall ensure  $\text{op}(G_d^{\text{nece1}}) \leq n$  and is as close as possible to  $n$ ;
- we shall ensure  $\text{op}(G_d^{\text{nece3}}) = \text{op}(G_d^{\text{nece2}}) \leq m$  and is as close as possible to  $m$ ;
- we shall ensure  $\text{op}(G_d^{\text{nece}}) = s$  is exact.

In other words, hyperparameter  $s$  controls exactly how many operations are needed to compute the query parameter, which is the primary factor controlling the problem’s difficulty.

#### E.2.1 CONSTRUCTION OF $G_d^{\text{nece1}}, G_d^{\text{nece2}}$

Given a structure graph  $G_s$ , recall its edges represent all the instance parameters we shall use. Its abstract parameters are those ones that describe quantities across 1 or multiple layers: for instance in Figure 1, Central High’s number of Classrooms is across 1 layer, and Central High’s number of Backpacks is across 2 layers. We define this number as the *difficulty level* of abstract parameters.

With this notion, our construction of  $G_d^{\text{nece1}}$  and  $G_d^{\text{nece2}}$  are described together in Algorithm 2.

At a high level, we try to incrementally and randomly add abstract parameters to  $G_d^{\text{nece1}}$  while maintaining  $\text{op}(G_d^{\text{nece1}}) \leq n$ . We cannot make this exact equality because when adding a single abstract parameter requires also (recursively) adding all the other parameters it may depend on. We tried to prioritize adding abstract parameters with higher difficulty levels. Once we finish constructing  $G_d^{\text{nece1}}$ , we randomly add additional instance parameters from  $G_s$  to make it  $G_d^{\text{nece2}}$ .

<sup>19</sup>For instance, in Figure 1,  $a =$  “Riverview High’s total number of Backpacks” is equal to  $ip_1 \times ap_1 + ip_2 \times ap_2$  for  $ip_1 =$  “Riverview High’s number of Dance Studios”,  $ip_2 =$  “Riverview High’s number of Film Studios”,  $ap_1 =$  “each Dance Studio’s number of Backpacks”,  $ap_2 =$  “each Film Studio’ number of Backpacks”, where  $ip_1, ip_2$  are instance parameters and  $ap_1, ap_2$  are abstract parameters. In this case, this abstract parameter depends on 4 other parameters, and requires 3 arithmetic operations.



**Algorithm 2**  $G_d^{\text{nece2}} = \text{DrawNecessary1}(G_s, n, m)$ 


---

**Input:** structure graph  $G_s$  of depth  $d$ ,  $n, m \in \mathbb{N}$  with  $1 \leq n \leq m$

- 1:  $G_d^{\text{nece1}} \leftarrow$  empty graph
- 2: **repeat**
- 3:      $\text{updated} \leftarrow$  false
- 4:     **for**  $i \leftarrow d - 1, \dots, 1$  **do**
- 5:         **if**  $\exists$  abstract parameter of difficulty level  $i$  in  $G_s$  that is not yet in  $G_d^{\text{nece1}}$  **then**
- 6:             randomly pick one such abstract parameter  $a$  of difficulty level  $i$
- 7:              $G' \leftarrow G_d^{\text{nece1}} + a$  and all instance/abstract parameters  $a$  may (recursively) depend on  
 $\diamond$  also add their dependency edges
- 8:             **if**  $\text{op}(G') \leq n$  **then**
- 9:                  $G_d^{\text{nece1}} \leftarrow G'$ ;  $\text{updated} \leftarrow$  true; **break**
- 10: **until**  $\text{updated} =$  false
- 11:  $G_d^{\text{nece2}} \leftarrow G_d^{\text{nece1}}$   $\diamond \text{op}(G_d^{\text{nece1}}) \leq n$  and all instance parameters in  $G_d^{\text{nece1}}$  have in-degree 0
- 12: **for**  $i \leftarrow 1, 2, \dots, m - \text{op}(G_d^{\text{nece1}})$  **do**
- 13:     **if** there's leftover instance parameter in  $G_s$  not yet in  $G_d^{\text{nece2}}$ , add a random one to  $G_d^{\text{nece2}}$
- 14: **return**  $G_d^{\text{nece2}}$   $\diamond \text{op}(G_d^{\text{nece2}}) \leq m$  and all instance parameters in  $G_d^{\text{nece2}}$  have in-degree 0

---

E.2.2 CONSTRUCTION OF  $G_d^{\text{nece3}}$ 

Our goal next is to select a random query parameter in  $G_d^{\text{nece2}}$  and construct a random topological ordering  $\text{Topo}$  for all the parameters in  $G_d^{\text{nece2}}$ , so as to ensure that all the parameters are necessary towards the computation of query.

We start with  $\text{Topo} = [\text{query}]$  and append parameters to its left one by one. During this process, we may also introduce new edges randomly; we start with  $G_d^{\text{nece3}} = G_d^{\text{nece2}}$  and add edges incrementally. This process may not always succeed — sometimes the created topological ordering cannot make all the parameters necessary towards the computation of the query. If this happens we declare a failure.<sup>20</sup>

We introduce two notions (we use  $G_d^{\text{nece3}} \setminus \text{Topo}$  to denote the set of vertices in  $G_d^{\text{nece3}}$  that are not in  $\text{Topo}$ ):

- $\text{Next1}_{G_d^{\text{nece3}}}(\text{Topo}) := \{a \in G_d^{\text{nece3}} \setminus \text{Topo} \mid \exists(a \rightarrow b) \in G_d^{\text{nece3}} \text{ for some } b \in \text{Topo}\}$

Intuitively, if  $a \notin \text{Next1}(\text{Topo})$  then we cannot immediately append  $a$  to the front of  $\text{Topo}$ , because it is not yet necessary towards the computation of query.

- $\text{Next2}_{G_d^{\text{nece3}}}(\text{Topo}) := \{a \in G_d^{\text{nece3}} \setminus \text{Topo} \mid \nexists(a \rightarrow b) \in G_d^{\text{nece3}} \text{ for any } b \in G_d^{\text{nece3}} \setminus \text{Topo}\}$

Intuitively, if  $a \notin \text{Next2}_{G_d^{\text{nece3}}}(\text{Topo})$  then we cannot immediately append  $a$  to the front of  $\text{Topo}$ , because some other parameter depends on it and is not yet added to  $\text{Topo}$ . (Obviously we always have  $\text{Next2}_{G_d^{\text{nece3}}}(\text{Topo}) \neq \emptyset$  unless  $G_d^{\text{nece3}} \setminus \text{Topo} = \emptyset$  so we are done.)

Our generation algorithm is now easy to describe: we keep adding parameters that are in  $\text{Next1}_{G_d^{\text{nece3}}}(\text{Topo}) \cap \text{Next2}_{G_d^{\text{nece3}}}(\text{Topo})$  to the front of  $\text{Topo}$ ; and if we get stuck, we introduce new edges to  $G_d^{\text{nece3}}$  (or declare failure). The pseudocode is in Algorithm 3.

<sup>20</sup>The outside pseudocode, which comes later, shall go back to regenerate the structure graph and start again.

**Algorithm 3** ( $G_d^{\text{nece3}}, \text{Topo}$ ) = DrawNecessary2( $G_d^{\text{nece2}}$ )

---

```

1134 1:  $G_d^{\text{nece3}} \leftarrow G_d^{\text{nece2}}$ ;  $\text{Topo} \leftarrow []$ .
1135
1136 2: while true do
1137 3:   if  $\text{Topo} = []$  then
1138 4:      $\text{param}_0 \leftarrow$  random parameter in  $\text{Next2}_{G_d^{\text{nece3}}}(\text{Topo})$ ;  $\diamond$  this is query parameter
1139 5:   else
1140 6:      $\text{param}_0 \leftarrow$  random parameter in  $\text{Next1}_{G_d^{\text{nece3}}}(\text{Topo}) \cap \text{Next2}_{G_d^{\text{nece3}}}(\text{Topo})$ ;
1141 7:    $\text{Topo} = [\text{param}_0] + \text{Topo}$   $\diamond$  append to the front
1142 8:   if  $G_d^{\text{nece3}} \setminus \text{Topo} = \emptyset$  then break
1143 9:   if  $\text{Next1}_{G_d^{\text{nece3}}}(\text{Topo}) \cap \text{Next2}_{G_d^{\text{nece3}}}(\text{Topo}) = \emptyset$  then
1144 10:    if  $\text{param}_0$  is abstract then return failure
1145 11:     $\text{param}_1 \leftarrow$  a “random” parameter in  $\text{Next2}_{G_d^{\text{nece3}}}(\text{Topo})$ .  $\diamond$  see Remark E.4
1146 12:    add edge  $\text{param}_1 \rightarrow \text{param}_0$  to  $G_d^{\text{nece3}}$ .  $\diamond$  now  $\text{param}_1 \in \text{Next1}_{G_d^{\text{nece3}}}(\text{Topo})$ 
1147 13:    else if  $\text{param}_0$  is instance parameter then
1148 14:      if a probability event  $p_0$  occurs for  $p_0$  uniform chosen in  $(0, 1)$  then
1149 15:         $\text{param}_1 \leftarrow$  a “random” parameter in  $G_d^{\text{nece3}} \setminus \text{Topo}$ .  $\diamond$  see Remark E.4
1150 16:        add edge  $\text{param}_1 \rightarrow \text{param}_0$  to  $G_d^{\text{nece3}}$ .  $\diamond$  now  $\text{param}_1 \in \text{Next1}_{G_d^{\text{nece3}}}(\text{Topo})$ 
1151 17: return ( $G_d^{\text{nece3}}, \text{Topo}$ )  $\diamond$   $\text{op}(G_d^{\text{nece3}}) \leq m$  and all instance parameters in  $G_d^{\text{nece3}}$  have in-degree  $\leq 1$ 

```

---

**Proposition E.3.** Every instance parameter in  $G_d^{\text{nece3}}$  has in-degree  $\leq 1$  and thus  $\text{op}(G_d^{\text{nece3}}) = \text{op}(G_d^{\text{nece2}})$ .

*Remark E.4.* In Line 11 and Line 15 of Algorithm 3, when randomly selecting  $\text{param}_1$  from a set, instead of doing so uniformly at random, to improve the algorithm’s success rate and the problem’s difficulty level, we introduce a discursion that that biases slightly towards abstract parameters and parameters already in  $\text{Next1}_{G_d^{\text{nece3}}}(\text{Topo})$ .<sup>21</sup> Specifically, we first generate  $g \sim \mathcal{N}(0, 1)$  a random Gaussian, then define  $\text{weight}(a) = (\mathbb{1}_{a \text{ is abstract}} + \mathbb{1}_{a \in \text{Next1}_{G_d^{\text{nece3}}}(\text{Topo})}) \cdot |g|$ , and then sample  $a$  with a probability  $\propto e^{\text{weight}(a)}$ .

### E.2.3 CONSTRUCTION OF $G_d^{\text{nece}}$

So far we have created  $G_d^{\text{nece3}}$  and  $\text{Topo}$  with the property that every instance parameter in  $G_d^{\text{nece3}}$  has in-degree  $\leq 1$ . In the next step, we add additional dependency edges to make in-degree to be a random number between 1 and 4. We do so by introducing additional edges; and we also introduce an additional vertex RNG. This is our final *necessary* dependency graph  $G_d^{\text{nece}}$ .

Our pseudocode is given in Algorithm 4. In this step, we shall make sure  $\text{op}(G_d^{\text{nece}}) = s$  is exact (and declare failure if this is not possible). We do so to precisely control the solution’s difficulty (so that when we evaluate the model, we can choose to evaluate it on problems with a fixed value of  $s$ ).

---

<sup>21</sup>For those who are interested, abstract parameters are the keys to cause the generation process to fail, because once they become  $\text{param}_0$  we cannot add edges  $\text{param}_1 \rightarrow \text{param}_0$ ; so we had better select them earlier than later (thus put them at the back of  $\text{Topo}$ ). On the other hand, for  $\text{param}_1$  that is already in  $\text{Next1}_{G_d^{\text{nece3}}}(\text{Topo})$ , adding this edge  $\text{param}_1 \rightarrow \text{param}_0$  does not further change it; this can help us create a problem whose solution “depth” is higher.

**Algorithm 4**  $G_d^{\text{necce}} = \text{DrawNecessary3}(G_d^{\text{necce3}}, \text{Topo}, s)$ 


---

```

1188 1:  $\text{cur\_op}(a) \leftarrow \text{op}_{G_d^{\text{necce3}}}(a)$  for every parameter  $a \in G_d^{\text{necce3}}$ .
1189
1190 2:  $\text{max\_op}_{\text{Topo}}(a) :=$  the maximum number of operations an instance parameter  $a$  can require.22
1191
1192 3: while  $\sum_{a \in G_d^{\text{necce3}}} \text{cur\_op}(a) < s$  do
1193 4:   randomly select an instance parameter  $a \in G_d^{\text{necce3}}$  with  $\text{cur\_op}(a) < \text{max\_op}_{\text{Topo}}(a)$ ;
1194 5:   if  $a$  is found then  $\text{cur\_op}(a) \leftarrow \text{cur\_op}(a) + 1$  else return failure.
1195
1196 6:  $G_d^{\text{necce}} \leftarrow G_d^{\text{necce3}} + \text{vertex RNG.}$ 
1197
1198 7: for each instance parameter  $a$  in  $G_d^{\text{necce3}}$  do
1199 8:    $\text{pool} \leftarrow \text{RNG} + \text{all parameters in front of } a \text{ in Topo.}$ 
1200 9:   if  $\text{cur\_op}(a) = 1$  then
1201 10:     $\text{dep\_num} \leftarrow 1 \text{ or } 2 \text{ each w.p. } 0.5;$ 
1202 11:   else
1203 12:     $\text{dep\_num} \leftarrow \text{cur\_op}(a) + 1$ 
1204 13:    $\text{dep\_num} \leftarrow \min\{|\text{pool}|, \text{dep\_num}\}$ 
1205 14:   if  $\exists(b \rightarrow a) \in G_d^{\text{necce3}}$  for some  $b \in \text{pool}$  then  $\diamond$  at most one such  $b$ 
1206 15:     $\text{pool} \leftarrow \text{pool} \setminus \{b\}$  and  $\text{dep\_num} \leftarrow \text{dep\_num} - 1$ 
1207 16:   if  $\text{dep\_num} = |\text{pool}|$  then
1208 17:    add  $b \rightarrow a$  to  $G_d^{\text{necce}}$  for all  $b \in \text{pool};$ 
1209 18:   else
1210 19:    with probability 0.5, add  $\text{RNG} \rightarrow a$  to  $G_d^{\text{necce}}$  and  $\text{dep\_num} \leftarrow \text{dep\_num} - 1$ 
1211 20:     $\text{pool} \leftarrow \text{pool} \setminus \{\text{RNG}\}$ 
1212 21:    add  $b \rightarrow a$  to  $G_d^{\text{necce}}$  for  $\text{dep\_num}$  randomly select elements  $b$  in  $\text{pool}.$ 
1213
1214 22: return  $G_d^{\text{necce}}$   $\diamond \text{op}(G_d^{\text{necce}}) = s$  is exact

```

---

E.2.4 CONSTRUCTION OF  $G_d$ 

Finally, once we have  $G_d^{\text{necce}}$  the necessary dependency graph, we are left to add unnecessary dependency edges (and unnecessary parameters) to form the complete  $G_d$ .

During this process, we shall add all the *remaining* instance parameters from  $G_s$  into  $G_d$ . When adding each of them, we randomly select the parameters that it shall depend on from all the previously known parameters.<sup>23</sup> Note that during this process, we may also introduce new, unnecessary abstract parameters, see the full pseudocode in Algorithm 5.

*Remark E.5.*  $G_d$  consists of all the instance and query parameters in  $G_s$  and the abstract parameters they may (recursively) depend on. There may exist abstract parameters that can be described in  $G_s$  that are not present in  $G_d$ ; but all the instance parameters in  $G_s$  shall be present in  $G_d$ .

<sup>22</sup>If an instance parameter  $a$  is the  $i$ -th element in  $\text{Topo}$ , then  $\text{max\_op}(a) = \min\{3, \max\{1, i - 1\}\}$ . (Recall we require each instance parameter to depend on at most 4 vertices in the dependency graph and this amounts to no more than 3 operations.)

<sup>23</sup>In fact, we do slightly smarter than the most naive approach. If one simply lets each newly added unnecessary parameter to depend, randomly among all the parameters that have already been added to  $G_d$ , then those unnecessary parameters will likely appear towards the end of the topological order. For such reason, we give it 0.5 probability to depend only on a set  $\text{IndList}$ , which consists of newly-added, unnecessary parameters, that do not depend on  $G_d$ . This way, the unnecessary parameters can also appear to the front of the topologic order.

---

```

1242 Algorithm 5  $G_d = \text{DrawUnnecessary}(G_s, G_d^{\text{nece}})$ 
1243
1244 1:  $\text{IndList} \leftarrow \emptyset$ ;
1245 2: while  $\exists$  instance parameter in  $G_s$  not yet in  $G_d$  do
1246 3:    $K \leftarrow$  all params in  $G_d$  + all abstract params computable using parameters in  $G_d$ ;
1247 4:   randomly select an instance parameter  $a$  in  $G_s$  not yet in  $G_d$ ; and add  $a$  to  $G_d$ ;
1248 5:   if with half probability then
1249 6:      $\text{pool} \leftarrow \text{IndList} \cup \{\text{RNG}\}$ ;  $\text{IndList} \leftarrow \text{IndList} \cup \{a\}$ ;
1250 7:   else
1251 8:      $\text{pool} \leftarrow K \cup \{\text{RNG}\}$ ;
1252 9:    $\text{dep\_num} \leftarrow 1$ 
1253 10:  while  $\text{dep\_num} < \min\{4, |\text{pool}|\}$  do
1254 11:    with 0.5 probability,  $\text{dep\_num} \leftarrow \text{dep\_num} + 1$ ; otherwise break
1255 12:  if  $\text{dep\_num} = |\text{pool}|$  then
1256 13:     $\text{selected} \leftarrow \text{pool}$ 
1257 14:  else
1258 15:     $\text{selected} \leftarrow \{\}$ 
1259 16:    with probability 0.5, add  $\text{selected} = \{\text{RNG}\}$  and  $\text{dep\_num} \leftarrow \text{dep\_num} - 1$ 
1260 17:     $\text{pool} \leftarrow \text{pool} \setminus \{\text{RNG}\}$ 
1261 18:     $\text{selected} \leftarrow \text{selected} \cup \text{dep\_num}$  random elements from  $\text{pool}$ 
1262 19:  for each  $b \in \text{selected}$  do
1263 20:    if  $b \notin G_d$  then recursively add  $b$  and its dependencies to  $G_d$ ;
1264 21:    Add  $b \rightarrow a$  to  $G_d$ .
1265 22: return  $G_d$ 

```

---

### E.3 GENERATE ENGLISH: PROBLEM, QUESTION AND SOLUTION

At this point, we have constructed a dependency graph  $G_s$  where each instance parameter  $a \in G_s$  may depend on between 1 and 4 other vertices (could be abstract, instance parameters or RNG). We have not yet introduced how  $a$  should be computed, and we do this using a random process  $\text{GenSentence}(G_d, a)$  in Algorithm 6.

---

```

1273 Algorithm 6  $\text{GenSentence}(G_d, a)$ 
1274
1275 1:  $\text{str} \leftarrow$  “The number of [name of  $a$ ] equals”
1276 2:  $\text{pool} \leftarrow \{b \in G_d : \exists(b \rightarrow a) \in G_d\}$ .
1277 3: if  $\text{RNG} \in \text{pool}$  then
1278 4:    $\text{str} \leftarrow \text{str} +$  “[random int between 0 and 22]”; and  $\text{pool} \leftarrow \text{pool} \setminus \{\text{RNG}\}$ 
1279 5:   if  $|\text{pool}| > 0$ ,  $\text{str} \leftarrow \text{str} +$  “ more than” or “ times” each with probability 0.5.
1280 6: if  $|\text{pool}| = 1$  then
1281 7:    $\text{str} \leftarrow \text{str} +$  “[name of  $b$ ]” for  $\text{pool} = \{b\}$ .
1282 8: else if  $|\text{pool}| = |\{b, c\}| = 2$  then
1283 9:    $\text{str} \leftarrow \text{str} +$  “ the sum of [b] and [c]” or “ the difference of [b] and [c]” each w.p. 0.5.
1284 10: else
1285 11:    $\text{str} \leftarrow \text{str} +$  “ the sum of ..., .., and ..” with a random order of all elements from  $\text{pool}$ .

```

---

**Problem description.** The problem description simply consists of listing over all *instance* parameters  $a \in G_d$  and call  $\text{GenSentence}(G_d, a)$ . We then randomly shuffle the sentences to make the problem hard. Please note the descriptions of abstract parameters are *not present* in the problem description, because they are inherited from the hierarchical categorization. This is our attempt to make our math data also capture some English meaning, that is the model also needs to learn what items are in each category, and which category is above another category, etc. This is some knowledge that cannot be learned by reading one problem — it must be learned after reading sufficiently many data.

**Question description.** Our query parameter can be either an instance or abstract parameter, and it is the last element in  $\text{Topo}$ . We use a single sentence to ask for its value “How many ... does

... have?” and we put this question either at the front or at the end of the problem description (depending on the data type).

**Solution description.** We generate the solution text, by going over all the (instance or abstract) parameters in *Topo* in its correct order, and generate a single sentence to compute each parameter. This process is straightforward but notationally heavy, we describe it below by examples.

- Given any instance parameter  $a \in \text{Topo}$ , suppose for instance  $a$  is 7 times the sum of parameters  $b, c, d$ . Because of the topological order, the parameters  $b, c, d$  must have already defined with variable names, denoted as  $var_b, var_c, var_d$ . Then we define solution string of  $a$  as

“Define [name of a] as  $var_0; var_1 = var_b + var_c = \dots; var_2 = var_1 + var_d = \dots;$   
so  $var_0 = 7 \times var_2 = \dots$ .”

Here, the arithmetic computation is decomposed into 2-ary operations step by step separated with semicolons (so  $\text{op}_{G_d}(a)$  is exactly the number of semicolons). The  $var_0, var_1, var_2$  are three new (but distinct) random variables and their names are between a-z or A-Z and have 52 possible random choices. The “...” ignores the math calculations.

- Given an abstract parameter  $a \in \text{Topo}$ , suppose for instance  $a = b \times c + d \times e + f \times g$  then we similarly define its solution text as

“Define [name of a] as  $var_0; var_1 = var_b \times var_c = \dots; var_2 = var_d \times var_e = \dots;$   
“ $var_3 = var_f \times var_g = \dots; var_4 = var_1 + var_2 = \dots;$  so  $var_0 = var_3 + var_4 = \dots$ .”

Above, once again  $var_0, var_1, var_2, var_3, var_4$  are new (but distinct) random variable names from a-z or A-Z, and we break down the computation into 2-ary operations.

With the above examples in mind, and combining those with real examples in Figure 10, it should be very clear how the solution texts are generated.

*Remark E.6.*  $\text{op}(G_d^{\text{nece}})$  is equal to the total number of semicolons in the solution text, because it represents the total (and minimum!) number of arithmetic operations needed to compute the final query parameter.

#### E.4 PUTTING ALTOGETHER

We put together our data generation process for the structure graph  $G_s$  and the dependency graph  $G_d$  (along with  $G_d^{\text{nece}}, \text{Topo}$ ) in Algorithm 7.

In particular, we use global parameters  $\text{ip}_{\max}$  and  $\text{op}_{\max}$ : the former controls the maximum number of instance parameters, and the latter controls the maximum number of solution operations. We select  $n, m, s$  based on  $\text{op}_{\max}$  (to ensure that  $1 \leq n \leq m \leq s \leq \text{op}_{\max}$ ), and  $d, e, w_0, w_1$  based on  $\text{ip}_{\max}$  and  $s$ . We also provide a boolean switch *force* and when *force* = true, we shall force  $s = \text{op}_{\max}$  so that the generated math problem will have its solution to be of exactly  $\text{op}_{\max}$  operations.

We define datasets

- $\text{iGSM}^{\text{op} \leq \text{op}_{\max}, \text{ip} \leq \text{ip}_{\max}}$  as the process of invoking `DrawAll`( $\text{op}_{\max}, \text{ip}_{\max}, \text{force} = \text{false}$ ).
- $\text{iGSM}^{\text{op} = \text{op}_{\max}, \text{ip} \leq \text{ip}_{\max}}$  as the process of invoking `DrawAll`( $\text{op}_{\max}, \text{ip}_{\max}, \text{force} = \text{true}$ ).

Using this language:

- The training data *iGSM-med* is  $\text{iGSM}^{\text{op} \leq 15, \text{ip} \leq 20}$ ;
- The eval data of *iGSM-med* additionally includes  $\text{iGSM}^{\text{op} = \text{op}, \text{ip} \leq 20}$  for  $\text{op} \in \{15, 20, 21, 22, 23\}$ ;
- The training data *iGSM-hard* is  $\text{iGSM}^{\text{op} \leq 21, \text{ip} \leq 28}$ ;
- The eval data of *iGSM-hard* additionally includes  $\text{iGSM}^{\text{op} = \text{op}, \text{ip} \leq 28}$  for  $\text{op} \in \{21, 28, 29, 30, 31, 32\}$ .

*Remark E.7.* During training (regardless of pretrain or finetune for probing tasks), we only use those data whose hash value of their solution template (see Footnote 9) is  $< 17 \pmod{23}$ , and during evaluation we only use those whose hash value is  $\geq 17 \pmod{23}$ . This ensures a strict separation between train and test data (even in terms of their solution templates).

Remark E.8. In Algorithm 7, we chose  $s = \min\{t_0, t_1\}$ , where  $t_0$  and  $t_1$  are two random integers between 1 and  $\text{op}_{\max}$ . This choice encourages more easier math problems in the pretrain data, which we found improves the model’s learning.

---

**Algorithm 7** DrawAll( $\text{op}_{\max}$ ,  $\text{ip}_{\max}$ ,  $\text{force}$ ) generation

---

```

1:  $s \leftarrow \min\{t_0, t_1\}$  for  $t_0, t_1$  being two random integers from 1 and  $\text{op}_{\max}$ 
2: If  $\text{force} = \text{true}$  then  $s \leftarrow \text{op}_{\max}$ .
3:  $n \leftarrow \max\{t_0, t_1\}$  for  $t_0, t_1$  being two random integers from 1 and  $s$ 
4:  $m \leftarrow$  random integer between  $n$  and  $s$ 
5:  $d \leftarrow$  a random choice among  $\{2, 3, 4\}$  with distribution according to  $\text{softmax}(\text{weight})$ 
    $\diamond$  for  $\text{weight} = [-(\text{rel} - 0.2)^2, -(\text{rel} - 0.5)^2, -(\text{rel} - 0.8)^2]$  for  $\text{rel} = \frac{s-1}{\text{ip}_{\max}-1}$ 
6:  $t_0, t_1 \leftarrow$  two random choices among  $\{2, 3, 4\}$  with distribution according to  $\text{softmax}(\text{weight})$ 
7:  $w_0 \leftarrow \min\{t_0, t_1\}$  and  $w_1 \leftarrow \max\{t_0, t_1\}$ .
8:  $e \leftarrow \min\{t_0, t_1, (d-1)w_1^2\}$  for  $t_0, t_1$  being random integers between  $(d-1)w_0$  and  $\text{ip}_{\max}$ 
9:  $G_s \leftarrow \text{DrawStructure}(e, d, w_0, w_1)$ 
10:  $G_d^{\text{neces2}} \leftarrow \text{DrawNecessary1}(G_s, n, m)$ 
11:  $(G_d^{\text{neces3}}, \text{Topo}) \leftarrow \text{DrawNecessary2}(G_d^{\text{neces2}})$   $\diamond$  if fail, go to Line 9; if fail for 1000 times, go to
    Line 1
12:  $G_d^{\text{neces}} \leftarrow \text{DrawNecessary3}(G_d^{\text{neces3}}, \text{Topo}, s)$   $\diamond$  if fail, go to Line 1
13:  $G_d \leftarrow \text{DrawUnnecessary}(G_s, G_d^{\text{neces}})$ 
14: return  $(G_d, G_d^{\text{neces}}, \text{Topo})$   $\diamond$  and generate English descriptions following Section E.3

```

---

## F EXPERIMENT DETAILS

**Model.** We use the GPT2 architecture (Radford et al., 2019), replacing its absolute positional embedding with modern rotary positional embedding (Su et al., 2021; Black et al., 2022), still referred to as GPT2 for short. (We also played with the Llama architecture, especially with gated MLP layers, and did not see any benefit of using it. This GPT2 performs comparably to Llama/Mistral at least for knowledge tasks (Allen-Zhu & Li, 2024b).)

Let GPT2- $\ell$ - $h$  denote an  $\ell$ -layer,  $h$ -head,  $64h$ -dim GPT2 model. We primarily use GPT2-12-12 (a.k.a. GPT2-small) in this paper, but in Section 6 we explore larger models with different widths and depths. Our size-1 models are GPT2-4-21, GPT2-8-15, GPT2-12-12, GPT2-16-10, GPT2-20-9, roughly the same size as GPT2-small. Our size-2 models are GPT2-4-30, GPT2-8-21, GPT2-12-17, GPT2-16-15, GPT2-20-13, roughly twice the size of GPT2-small.

We use the default GPT2Tokenizer, and a context length of 768/1024 for language model pretraining on iGSM-med/iGSM-hard and a context length of 2048 for evaluation.

**Data size.** For both pretraining and finetuning, we did not limit the amount of training data; we generated new data on-the-fly. We do not explore sample complexity in this paper, such as the number of math problems needed to achieve a certain level of accuracy, as it would complicate the main message of this paper.

### F.1 PRETRAIN EXPERIMENT DETAILS

**Pretrain parameters.** We used the AdamW optimizer with mixed-precision fp16,  $\beta = (0.9, 0.98)$ , cosine learning rate decay (down to 0.01x of peak learning rate in the end), and 1000 steps of linear ramp-up. We used a mixture of V100/A100 GPUs, but the GPU specifications are not relevant here.<sup>24</sup> For all of our pretrain experiments:

- On the iGSM-med datasets, we used a (peak) learning rate 0.002, weight decay of 0.05, batch size of 512, context length of 768, and trained for 100,000 steps.
- On the iGSM-hard datasets, we used a (peak) learning rate 0.002, weight decay of 0.03, batch size of 256, context length of 1024, and trained for 200,000 steps.

<sup>24</sup>A 128-GPU job with batch size 1 each would be identical to a 32-GPU job with batch size 4 each.



Our pretrain data is constructed by randomly generating math problems (and solutions), concatenating them together, and truncating them (in the right) to fit within the 768 or 1024-sized context window. If a problem is longer than the context window size, we discard it (this happens very rarely).

**Test-time parameters.** When evaluating on test data, we discard problems (with ground-truth solutions) longer than 768 tokens for iGSM-med (or 1024 for iGSM-hard), but allow the generation process to use up to 2048 tokens. This ensures that all problems evaluated during test time can be correctly answered within 768 or 1024 tokens (not to say 2048). We did this for a purpose;<sup>25</sup> for readers interested in the test-time performance without discarding such problems, see Appendix G.

We use either beam=1 and dosample=False (greedy) or beam=4 and dosample=True (beam-search multinomial sampling) to present test accuracies. We discover it is better to keep dosample=False while beam=1 and dosample=True while beam=4. We also tried larger beam sizes and found no further improvements.

**Accuracy statistics.** Our main accuracies are presented in Figure 3, where each entry is averaged over 4096 math problems of that type. Our accuracies *are not simply* from comparing the answer integers (between 0 and 22); instead we have written a parser to make sure the model’s intermediate solution steps are fully-correct.

For the “redundancy” experiment Figure 3, we tested each model again with 4096 math problems in each case and presented the results among fully-correct solutions. For this figure, we present beam=1 for cleanness and the results for beam=4 are almost completely identical.

For the “depth matters” experiment Figure 7, because we care about the (relatively small) accuracy differences across models, we pretrain using two different random seeds, and evaluate with both beam=1/4; we then present the best accuracies in each entry with respect to the 2 seeds and 2 beam choices. The accuracies are again over 4096 math problems.

## F.2 V-PROBING

Our V-probing was first introduced in Section 4.1 with more details given in Section C. It is a *fine-tuning* process upon the pretrained language model, with an additional linear head on the output layer, and a small rank- $r$  update on the input (embedding) layer. The pretrained model is frozen, and only this linear head and the rank- $r$  update are trainable parameters during the fine-tuning.

Recall we use  $r = 8$  in this paper (in contrast, the hidden dimension of GPT-12-12 is 768). This small value of  $r$  ensures if probing accuracy is high, it mostly comes from the pretrained model and not the additional trainable parameters.

For V-probing, we use the same configurations as pretrain, except that:

- For V-probing on the iGSM-med datasets, we used a learning rate of 0.002 (with no ramp-up, linear decay down to 0), weight decay of 0.01, batch size of 256, and trained for 100,000 steps.
- For V-probing on the iGSM-hard datasets, we used a learning rate of 0.002 (with no ramp-up, linear decay down to 0), weight decay of 0.01, batch size of 128, and trained for 100,000 steps.

**V-probing statistics.** In Figure 6(a), Figure 6(b), Figure 11, Figure 9(a), and Figure 9(b), we tested at least 4096 random problem-parameter pairs *in each cell*. In Figure 9(a) and Figure 9(b), when evaluating probing results on GPT-2 model’s *generated* correct or wrong solutions, we used beam=1 and dosample=False (greedy) for generation. (Results are similar for beam=4.)

In our layer-wise  $\text{nece}(A)$  probing experiments (Figure 8 and Figure 13), we tested at least 73728 random problem-parameter pairs in each case and then divided the results into bins based on the parameter  $A$ ’s distances to the queries.

<sup>25</sup>It ensures that if a model fails to solve a hard problem with a large `op` at test time, it is mostly not due to token-length generalization failure (which could be due to rotary embedding), but due to the failure to generalize from small `op` training data to large `op` test data.

## G ADDITIONAL EXPERIMENTS WITH TOKEN-LENGTH GENERALIZATION

As discussed in Section F.1, in the main body of this paper, when evaluating models on the iGSM test set, we allowed a context length of 2048 tokens but intentionally discarded problems (with ground-truth solutions) exceeding 768 tokens for iGSM-med or 1024 tokens for iGSM-hard.

This approach was taken because we pretrained the model with a context length limit of 768 or 1024. To perform *controlled experiments*, we aimed to separate “length generalization” from “op generalization”. For instance, in Figure 3, we observe that a model pretrained on iGSM-hard<sup>op $\leq$ 21</sup> shows degraded performance when generalizing to iGSM-hard<sup>op=28</sup>. Since both (train and test) datasets have a maximum token length of 1024, this degradation is primarily due to the increased solution difficulty op, not the increased token length.

After our paper appeared, some readers expressed interest in understanding the model’s performance when both difficulties (i.e., increasing op and token length) arise. In this section, we repeat most experiments without enforcing the test-time maximum token length of 768 or 1024. We refer to this as “token-length generalization” to distinguish it from our original results.

To begin with, let us show the length distribution difference on our iGSM-med and iGSM-hard datasets in Figure 14, either with or without such truncation to 768 or 1024 tokens.

|                                     | iGSM-med    |            |                   |            |            |            | iGSM-hard   |             |                   |             |              |              |              |
|-------------------------------------|-------------|------------|-------------------|------------|------------|------------|-------------|-------------|-------------------|-------------|--------------|--------------|--------------|
|                                     | in-dist     |            | out-of-dist (OOD) |            |            |            | in-dist     |             | out-of-dist (OOD) |             |              |              |              |
| no truncation   problem len         | 222.7±106.5 | 284.2±89.1 | 320.4±84.3        | 328.3±85.4 | 332.4±79.1 | 339.1±81.0 | 280.6±140.3 | 368.7±112.7 | 417.5±111.7       | 433.4±117.8 | 440.8±118.2  | 441.5±115.0  | 451.3±113.6  |
| no truncation   solution len        | 109.1±71.6  | 295.6±20.5 | 386.1±25.1        | 403.1±24.6 | 421.5±25.7 | 437.3±26.8 | 151.2±98.8  | 404.1±24.3  | 526.7±30.6        | 546.7±32.3  | 562.5±30.9   | 578.6±32.6   | 596.2±32.9   |
| no truncation   total length        | 331.8±137.7 | 579.8±97.8 | 706.5±97.1        | 731.4±95.7 | 753.9±91.8 | 776.4±93.3 | 432.0±184.9 | 772.8±122.4 | 944.2±127.1       | 980.1±133.5 | 1003.3±132.8 | 1020.1±129.9 | 1047.5±129.0 |
| truncate by 768/1024   problem len  | 225.3±105.0 | 276.0±78.3 | 281.2±51.4        | 282.2±50.1 | 280.5±44.8 | 275.9±39.7 | 266.5±136.3 | 357.1±99.5  | 368.4±66.3        | 368.1±66.9  | 365.0±58.1   | 361.6±54.9   | 357.5±50.3   |
| truncate by 768/1024   solution len | 112.1±71.5  | 295.1±20.1 | 379.6±21.2        | 395.9±21.7 | 411.2±21.5 | 425.9±21.6 | 153.3±99.1  | 403.4±23.8  | 518.2±26.9        | 535.7±27.5  | 551.0±25.7   | 566.0±26.2   | 581.2±25.8   |
| truncate by 768/1024   total length | 337.3±134.2 | 571.0±86.6 | 660.8±59.9        | 678.2±56.7 | 691.7±50.4 | 701.8±44.8 | 419.8±189.0 | 760.5±108.9 | 886.5±76.1        | 903.8±75.6  | 916.0±66.0   | 927.6±60.6   | 938.7±55.3   |
|                                     | op ≤ 15     | op=15      | op=20             | op=21      | op=22      | op=23      | op ≤ 21     | op=21       | op=28             | op=29       | op=30        | op=31        | op=32        |

Figure 14: After discarding problems that exceed 768/1024 token length, the average problem length decreases.

We repeat Results 2-3 in Figure 15. The results show that with increasing problem (and solution) length, the model’s out-of-distribution accuracies further decrease. However, among correctly generated solutions, the model still mostly generates correct solutions at test time.

We also repeat Results 4-6 in Figure 16. These results indicate no significant difference in our probing results, confirming that our statements about the model’s mental process hold even for problems with increased length.

|                  | iGSM-med_pq |       |                   |       | iGSM-med_qp |       |                   |         | iGSM-hard_pq |       |                   |       | iGSM-hard_qp |               |                   |       |       |       |       |       |       |               |         |       |       |       |       |       |       |      |
|------------------|-------------|-------|-------------------|-------|-------------|-------|-------------------|---------|--------------|-------|-------------------|-------|--------------|---------------|-------------------|-------|-------|-------|-------|-------|-------|---------------|---------|-------|-------|-------|-------|-------|-------|------|
|                  | in-dist     |       | out-of-dist (OOD) |       | in-dist     |       | out-of-dist (OOD) |         | in-dist      |       | out-of-dist (OOD) |       | in-dist      |               | out-of-dist (OOD) |       |       |       |       |       |       |               |         |       |       |       |       |       |       |      |
| beam1 - nosample | 100         | 99.1  | 90.6              | 86.4  | 80.4        | 73.1  | 92.0              | 100     | 99.2         | 89.8  | 85.9              | 78.2  | 69.9         | 91.5          | 100               | 99.0  | 89.0  | 84.0  | 81.1  | 74.3  | 68.8  | 89.1          |         |       |       |       |       |       |       |      |
| beam4 - dosample | 100         | 99.2  | 91.0              | 87.1  | 80.7        | 73.9  | 92.0              | 100     | 99.2         | 89.5  | 86.3              | 78.8  | 71.0         | 91.5          | 100               | 98.7  | 87.9  | 84.2  | 79.1  | 73.0  | 68.0  | 89.7          | 100     | 99.0  | 89.7  | 84.1  | 81.1  | 74.8  | 69.7  | 89.2 |
|                  | op ≤ 15     | op=15 | op=20             | op=21 | op=22       | op=23 | op=20 (reask)     | op ≤ 15 | op=15        | op=20 | op=21             | op=22 | op=23        | op=20 (reask) | op ≤ 21           | op=21 | op=28 | op=29 | op=30 | op=31 | op=32 | op=28 (reask) | op ≤ 21 | op=21 | op=28 | op=29 | op=30 | op=31 | op=32 |      |

(a) Repetition of Figure 3 but including token-length generalization.

|                                   | iGSM-med_pq               |       |       |       | iGSM-med_qp |       |         |       | iGSM-hard_pq |       |       |       | iGSM-hard_qp |       |       |       |       |       |       |         |       |       |       |       |       |       |               |               |      |
|-----------------------------------|---------------------------|-------|-------|-------|-------------|-------|---------|-------|--------------|-------|-------|-------|--------------|-------|-------|-------|-------|-------|-------|---------|-------|-------|-------|-------|-------|-------|---------------|---------------|------|
|                                   | avg unnecessary operation | 0.00  | 0.00  | 0.00  | 0.00        | 0.00  | 0.00    | 0.00  | 0.00         | 0.00  | 0.00  | 0.00  | 0.00         | 0.00  | 0.00  | 0.00  | 0.00  | 0.00  | 0.00  | 0.00    | 0.00  | 0.00  | 0.00  | 0.00  | 0.00  | 0.00  | 0.00          | 0.00          | 0.00 |
| avg unnecessary operation (reask) | 0.02                      | 0.12  | 0.17  | 0.18  | 0.19        | 0.21  | 0.03    | 0.16  | 0.19         | 0.21  | 0.20  | 0.20  | 0.08         | 0.48  | 0.58  | 0.52  | 0.65  | 0.61  | 0.64  | 0.09    | 0.37  | 0.49  | 0.49  | 0.64  | 0.49  | 0.62  | 0.00          | 0.00          |      |
| avg unnecessary parameter         | 0.00                      | 0.00  | 0.00  | 0.00  | 0.00        | 0.00  | 0.00    | 0.00  | 0.00         | 0.00  | 0.00  | 0.00  | 0.00         | 0.00  | 0.00  | 0.00  | 0.00  | 0.00  | 0.00  | 0.00    | 0.00  | 0.00  | 0.00  | 0.00  | 0.00  | 0.00  | 0.00          | 0.00          | 0.00 |
| avg unnecessary parameter (reask) | 0.02                      | 0.10  | 0.13  | 0.14  | 0.14        | 0.15  | 0.02    | 0.13  | 0.16         | 0.17  | 0.16  | 0.16  | 0.07         | 0.37  | 0.40  | 0.36  | 0.44  | 0.40  | 0.44  | 0.07    | 0.29  | 0.35  | 0.35  | 0.44  | 0.33  | 0.42  | 0.00          | 0.00          | 0.00 |
|                                   | op ≤ 15                   | op=15 | op=20 | op=21 | op=22       | op=23 | op ≤ 15 | op=15 | op=20        | op=21 | op=22 | op=23 | op ≤ 21      | op=21 | op=28 | op=29 | op=30 | op=31 | op=32 | op ≤ 21 | op=21 | op=28 | op=29 | op=30 | op=31 | op=32 | op=28 (reask) | op=28 (reask) |      |

(b) Repetition of Figure 3 but including token-length generalization.

Figure 15: We repeat Results 2-3, allowing test-time problems to exceed the 768- or 1024-token maximum length used in the training set.

1512  
1513  
1514  
1515  
1516  
1517  
1518  
1519  
1520  
1521  
1522  
1523  
1524  
1525  
1526  
1527  
1528  
1529  
1530  
1531  
1532  
1533  
1534  
1535  
1536  
1537  
1538  
1539  
1540  
1541  
1542  
1543  
1544  
1545  
1546  
1547  
1548  
1549  
1550  
1551  
1552  
1553  
1554  
1555  
1556  
1557  
1558  
1559  
1560  
1561  
1562  
1563  
1564  
1565

| can_next(A) |                   |      |           |                   |      | dep(A,B) |                   |      |           |                   |      | known(A) |                   |      |           |                   |      |      |      |      |      |      |      |      |      |      |      |      |      |      |      |      |      |      |      |      |      |      |
|-------------|-------------------|------|-----------|-------------------|------|----------|-------------------|------|-----------|-------------------|------|----------|-------------------|------|-----------|-------------------|------|------|------|------|------|------|------|------|------|------|------|------|------|------|------|------|------|------|------|------|------|------|
| IGSM-med    |                   |      | IGSM-hard |                   |      | IGSM-med |                   |      | IGSM-hard |                   |      | IGSM-med |                   |      | IGSM-hard |                   |      |      |      |      |      |      |      |      |      |      |      |      |      |      |      |      |      |      |      |      |      |      |
| in-dist     | out-of-dist (OOD) |      | in-dist   | out-of-dist (OOD) |      | in-dist  | out-of-dist (OOD) |      | in-dist   | out-of-dist (OOD) |      | in-dist  | out-of-dist (OOD) |      | in-dist   | out-of-dist (OOD) |      |      |      |      |      |      |      |      |      |      |      |      |      |      |      |      |      |      |      |      |      |      |
| 57.4        | 59.9              | 57.0 | 56.7      | 55.7              | 55.6 | 61.7     | 65.3              | 61.4 | 61.3      | 59.2              | 58.5 | 58.4     | 84.6              | 82.2 | 83.0      | 83.5              | 83.5 | 83.7 | 82.6 | 79.5 | 80.2 | 81.3 | 82.2 | 82.8 | 82.7 | 87.0 | 87.6 | 75.0 | 74.8 | 74.5 | 74.3 | 84.8 | 73.5 | 71.7 | 72.1 | 72.4 | 71.8 | 71.7 |
| 99.9        | 99.5              | 99.2 | 99.1      | 99.0              | 98.9 | 99.8     | 99.4              | 98.7 | 98.7      | 98.5              | 98.4 | 98.1     | 99.7              | 99.3 | 99.0      | 98.9              | 98.8 | 98.8 | 99.6 | 99.0 | 98.5 | 98.4 | 98.7 | 98.5 | 98.3 | 100  | 100  | 100  | 100  | 100  | 100  | 100  | 100  | 99.9 | 99.9 | 99.9 | 99.9 | 99.9 |
| 99.6        | 99.0              | 98.7 | 98.5      | 98.3              | 98.1 | 99.9     | 99.4              | 98.9 | 98.8      | 98.7              | 98.6 | 98.4     | 99.3              | 98.9 | 98.6      | 98.5              | 98.5 | 98.5 | 99.7 | 99.4 | 99.0 | 99.0 | 99.1 | 99.0 | 98.9 | 100  | 100  | 100  | 100  | 99.9 | 99.9 | 100  | 100  | 99.8 | 99.8 | 99.8 | 99.7 | 99.5 |
| 63.8        | 62.0              | 62.0 | 62.3      | 63.0              | 63.8 | 63.1     | 69.9              | 69.6 | 69.6      | 69.6              | 69.2 | 69.2     | 84.6              | 82.2 | 83.0      | 83.3              | 83.3 | 83.7 | 82.8 | 79.5 | 80.2 | 81.3 | 82.2 | 82.8 | 82.7 | 87.3 | 87.4 | 75.0 | 74.8 | 74.6 | 74.4 | 85.1 | 73.5 | 71.8 | 72.3 | 72.6 | 72.0 | 71.9 |
| 65.7        | 61.9              | 62.5 | 62.2      | 62.7              | 63.1 | 63.0     | 59.2              | 60.8 | 60.9      | 61.8              | 62.3 | 62.8     | 84.6              | 82.2 | 83.0      | 83.3              | 83.3 | 83.7 | 82.6 | 79.5 | 80.2 | 81.3 | 82.2 | 82.8 | 82.7 | 87.3 | 87.4 | 76.3 | 76.0 | 75.5 | 75.4 | 85.8 | 76.4 | 75.1 | 74.7 | 74.4 | 74.2 | 73.6 |

(a) Repetition of Figure 6(a) but including token-length generalization.

| can_next(A) on negative labels when A is unnecessary |      |      |           |      |      | can_next(A) on positive labels when A is unnecessary |      |      |           |      |      | dep(A,B) on negative labels when A is unnecessary |      |      |           |      |      | dep(A,B) on positive labels when A is unnecessary |      |      |           |      |      |      |
|------------------------------------------------------|------|------|-----------|------|------|------------------------------------------------------|------|------|-----------|------|------|---------------------------------------------------|------|------|-----------|------|------|---------------------------------------------------|------|------|-----------|------|------|------|
| IGSM-med                                             |      |      | IGSM-hard |      |      | IGSM-med                                             |      |      | IGSM-hard |      |      | IGSM-med                                          |      |      | IGSM-hard |      |      | IGSM-med                                          |      |      | IGSM-hard |      |      |      |
| 99.3                                                 | 99.3 | 98.3 | 98.3      | 98.3 | 98.3 | 99.9                                                 | 99.9 | 99.9 | 99.9      | 99.9 | 99.9 | 99.9                                              | 99.9 | 99.9 | 99.9      | 99.9 | 99.9 | 99.9                                              | 99.9 | 99.9 | 99.9      | 99.9 | 99.9 | 99.9 |
| 99.9                                                 | 99.8 | 99.6 | 99.5      | 99.4 | 99.4 | 99.9                                                 | 99.9 | 99.9 | 99.9      | 99.9 | 99.9 | 99.9                                              | 99.9 | 99.9 | 99.9      | 99.9 | 99.9 | 99.9                                              | 99.9 | 99.9 | 99.9      | 99.9 | 99.9 | 99.9 |
| 99.8                                                 | 99.7 | 99.7 | 99.7      | 99.6 | 99.6 | 99.8                                                 | 99.8 | 99.8 | 99.8      | 99.8 | 99.8 | 99.8                                              | 99.8 | 99.8 | 99.8      | 99.8 | 99.8 | 99.8                                              | 99.8 | 99.8 | 99.8      | 99.8 | 99.8 | 99.8 |
| 99.9                                                 | 99.9 | 99.9 | 99.9      | 99.9 | 99.9 | 99.9                                                 | 99.9 | 99.9 | 99.9      | 99.9 | 99.9 | 99.9                                              | 99.9 | 99.9 | 99.9      | 99.9 | 99.9 | 99.9                                              | 99.9 | 99.9 | 99.9      | 99.9 | 99.9 | 99.9 |
| 99.9                                                 | 99.9 | 99.9 | 99.9      | 99.9 | 99.9 | 99.9                                                 | 99.9 | 99.9 | 99.9      | 99.9 | 99.9 | 99.9                                              | 99.9 | 99.9 | 99.9      | 99.9 | 99.9 | 99.9                                              | 99.9 | 99.9 | 99.9      | 99.9 | 99.9 | 99.9 |

(b) Repetition of Figure 6(b) but including token-length generalization.

| neces(A) |          |          |           |          |           |           |           |           |           |           |
|----------|----------|----------|-----------|----------|-----------|-----------|-----------|-----------|-----------|-----------|
| IGSM-med |          |          | IGSM-hard |          |           |           |           |           |           |           |
| 99.8%    | 98.8%    | 98.0%    | 96.7%     | 94.8%    | 99.6%     | 99.2%     | 98.9%     | 98.5%     | 97.8%     | 96.9%     |
| 94.1%    | 94.6%    | 95.2%    | 95.0%     | 95.2%    | 89.6%     | 89.2%     | 88.6%     | 89.6%     | 89.1%     | 89.4%     |
| 99.9%    | 99.6%    | 99.5%    | 99.2%     | 98.9%    | 99.8%     | 99.7%     | 99.7%     | 99.6%     | 99.5%     | 99.4%     |
| 98.8%    | 98.3%    | 98.4%    | 98.3%     | 98.3%    | 96.2%     | 95.9%     | 95.5%     | 95.8%     | 95.8%     | 95.6%     |
| 33.7%    | 35.1%    | 35.3%    | 41.2%     | 42.4%    | 19.6%     | 11.4%     | 14.5%     | 16.9%     | 19.9%     | 19.1%     |
| +91/270  | +197/561 | +167/473 | +178/432  | +201/474 | -213/1177 | -175/1539 | +228/1577 | +268/1589 | +326/1640 | +259/1355 |
| 34.1%    | 35.5%    | 34.8%    | 40.7%     | 38.7%    | 18.7%     | 12.5%     | 16.1%     | 16.3%     | 20.6%     | 15.3%     |
| +93/273  | +199/560 | +161/470 | +184/452  | +176/443 | -213/1141 | -189/1463 | +251/1560 | +246/1512 | +332/1611 | +274/1433 |
| 18.2%    | 23.1%    | 18.7%    | 28.8%     | 19.5%    | 21.0%     | 17.4%     | 15.5%     | 17.7%     | 18.3%     | 19.7%     |
| +49/331  | +161/697 | +123/668 | +141/697  | +127/651 | -212/1010 | -259/1485 | +221/1422 | +264/1488 | +271/1493 | +272/1381 |
| 16.9%    | 23.9%    | 20.8%    | 26.1%     | 15.2%    | 20.7%     | 16.6%     | 16.6%     | 19.8%     | 17.6%     | 18.8%     |
| +58/343  | +161/673 | +129/628 | +126/482  | +119/621 | -214/1036 | +236/1435 | +235/1395 | +292/1476 | +264/1487 | +257/1426 |
| op=15    | op=20    | op=21    | op=22     | op=23    | op=21     | op=28     | op=29     | op=30     | op=31     | op=32     |

(c) Repetition of Figure 9(a) but including token-length generalization.

| can_next(A) |          |          |           |          |          | neces_next(A) |          |          |           |          |          |           |          |          |          |          |          |
|-------------|----------|----------|-----------|----------|----------|---------------|----------|----------|-----------|----------|----------|-----------|----------|----------|----------|----------|----------|
| IGSM-med    |          |          | IGSM-hard |          |          | IGSM-med      |          |          | IGSM-hard |          |          |           |          |          |          |          |          |
| 99.2%       | 99.1%    | 99.0%    | 98.9%     | 98.7%    | 98.7%    | 98.5%         | 98.4%    | 98.1%    | 99.1%     | 99.0%    | 98.8%    | 98.7%     | 98.9%    | 98.6%    | 98.4%    | 98.4%    | 98.3%    |
| 98.7%       | 98.5%    | 98.3%    | 98.1%     | 98.9%    | 98.8%    | 98.7%         | 98.6%    | 98.4%    | 98.5%     | 98.2%    | 98.2%    | 98.0%     | 99.4%    | 99.4%    | 99.3%    | 99.3%    | 99.2%    |
| 71.8%       | 69.4%    | 67.3%    | 63.6%     | 58.2%    | 53.8%    | 54.1%         | 57.3%    | 56.0%    | 52.6%     | 49.6%    | 46.5%    | 44.5%     | 44.1%    | 44.6%    | 44.4%    | 45.3%    | 43.6%    |
| -181/252    | -311/448 | -408/606 | -551/867  | -163/280 | -206/383 | -250/462      | -352/614 | -445/794 | -133/253  | -223/450 | -282/606 | -386/868  | -124/281 | -171/383 | -205/462 | -278/614 | -346/794 |
| 71.7%       | 71.1%    | 67.7%    | 63.6%     | 62.4%    | 56.7%    | 54.8%         | 60.4%    | 57.2%    | 50.4%     | 48.0%    | 50.0%    | 46.2%     | 42.9%    | 42.4%    | 41.0%    | 46.0%    | 47.1%    |
| -189/298    | -322/453 | -423/605 | -501/802  | -171/274 | -220/389 | -273/499      | -388/642 | -463/806 | -110/298  | -218/454 | -313/626 | -408/884  | -118/275 | -165/389 | -204/498 | -295/642 | -380/807 |
| 63.9%       | 63.5%    | 65.2%    | 62.6%     | 52.4%    | 50.4%    | 52.5%         | 52.2%    | 55.8%    | 45.9%     | 50.5%    | 54.1%    | 52.3%     | 49.7%    | 45.3%    | 49.6%    | 51.5%    | 52.6%    |
| -204/319    | -313/493 | -473/726 | -635/1014 | -162/309 | -197/391 | -272/518      | -340/651 | -436/782 | -147/320  | -249/493 | -393/727 | -531/1016 | -154/310 | -177/391 | -257/518 | -335/651 | -412/783 |
| 66.0%       | 65.5%    | 65.3%    | 66.2%     | 52.6%    | 50.0%    | 53.5%         | 51.1%    | 53.8%    | 48.9%     | 51.5%    | 53.1%    | 51.0%     | 51.5%    | 46.8%    | 51.2%    | 51.0%    | 50.3%    |
| -210/318    | -324/495 | -479/733 | -633/1017 | -172/327 | -189/378 | -272/508      | -336/657 | -419/778 | -156/319  | -255/495 | -391/733 | -526/1020 | -169/328 | -177/378 | -260/508 | -350/657 | -492/780 |
| op=20       | op=21    | op=22    | op=23     | op=28    | op=29    | op=30         | op=31    | op=32    | op=20     | op=21    | op=22    | op=23     | op=28    | op=29    | op=30    | op=31    | op=32    |

(d) Repetition of Figure 9(b) but including token-length generalization.

Figure 16: We repeat Results 4-6, allowing test-time problems to exceed the 768- or 1024-token maximum length used in the training set.

## H FAILURE EXAMPLES ON GPT-4 / GPT-4O

In Figure 2, we conduct few-shot experiments using the latest versions of GPT-4 turbo (2024-04-09) and GPT-4o (2024-05-13) models to evaluate their accuracies on our iGSM-med<sub>pq</sub> dataset, with respect to different  $op \in \{2, 3, \dots, 20\}$ .

To ensure meaningful evaluation:

- We replaced mod23 with mod5 to ensure that any errors are not due to arithmetic mistakes. We also provided a few arithmetic computation examples.
- We minimized English diversity to ensure that any errors are not due to misunderstanding the problem description. Specifically,
  - We fixed a simple categorization (School, Classroom, Backpack, Stationerys), with only four items in each category.
  - We provided an English *background* paragraph to fully describe the structure graph (i.e., which item has which subitem), as well as the number of items in each category. The math problem is preceded by this background paragraph.
- We provided five-shot problem/solution examples to ensure that GPT-4 understands how to solve such math problems step by step.

We did not verify each step of GPT-4’s solution but checked if the final output number (between 0 and 4) matched the correct answer. The accuracy results are presented in Figure 2. It shows that the GPT-4o model is almost randomly guessing for  $op \geq 11$ , and GPT-4 turbo for  $op \geq 9$ .

Furthermore, Figure 17 shows that when the GPT-4/4o models fail to answer the math problems, it is mostly not due to format errors or misunderstanding of the problem. Instead, just like what we discovered in Section 5, GPT-4/4o fail also because they compute unnecessary parameters (i.e.,  $nece(A) = false$ ) or compute parameters that are not yet ready to be computed (i.e.,  $can\_next(A) = false$ ). This further confirms that our findings do connect to practice, regarding the model’s hidden reasoning process.

1620  
1621  
1622  
1623  
1624  
1625  
1626  
1627  
1628  
1629  
1630  
1631  
1632  
1633  
1634  
1635  
1636  
1637  
1638  
1639  
1640  
1641  
1642  
1643  
1644  
1645  
1646  
1647  
1648  
1649  
1650  
1651  
1652  
1653  
1654  
1655  
1656  
1657  
1658  
1659  
1660  
1661  
1662  
1663  
1664  
1665  
1666  
1667  
1668  
1669  
1670  
1671  
1672  
1673

**Example 1 (GPT-4o on iGSM-med<sub>pq</sub> (op=20)):**  
 The assistant defines parameters for a problem involving classrooms, studios, and backpacks. It fails to compute the parameter "Canvas Backpack's Ruler" in step 5. Failure reason: instant parameter "Canvas Backpack's Ruler" cannot be computed in step 5.

**Example 2 (GPT-4o on iGSM-med<sub>pq</sub> (op=10)):**  
 The assistant defines parameters for a problem involving schools, studios, and backpacks. It fails to compute the parameter "Dance Studio's Canvas Backpack" in step 5. Failure reason: instance parameter "Dance Studio's Canvas Backpack" cannot be computed in step 5. An annotation also points to an "unnecessary parameter" in the solution.

**Example 3 (GPT-4-turbo on iGSM-med<sub>pq</sub> (op=10)):**  
 The assistant defines parameters for a problem involving backpacks, studios, and calculators. It fails to compute the parameter "Canvas Backpack's Scissors" in step 5. Failure reason: instance parameter "Canvas Backpack's Scissors" cannot be computed in step 5.

**Example 4 (GPT-4-turbo on iGSM-med<sub>pq</sub> (op=5)):**  
 The assistant defines parameters for a problem involving schools, studios, and backpacks. It fails to compute the parameter "Lakeshore High's Backpack" in step 5. Failure reason: abstract parameter "Lakeshore High's Backpack" can't be computed yet; it equals  $L \times \text{"Film Studio's Backpack"} (= m + c)$  but it is not computed yet. An annotation also points to "unnecessary parameters" in the solution.

Figure 17: Failure examples for GPT-4/GPT-4o on iGSM-med<sub>pq</sub>. They make mistakes similar to what we discover in this paper, that is to compute unnecessary parameters in the solutions (i.e.,  $\text{nece}(A) = \text{false}$ ), as well as computing parameters that are not yet ready to compute (i.e.,  $\text{can\_next}(A) = \text{false}$ ).
